# Supplementary material for: Modeling transfer of vaginal microbiota from mother to infant in early life
Source: eLife. 2021 Jan 15;10:e57051. doi: 10.7554/eLife.57051 (PMC7810462; doi:10.7554/eLife.57051)
Supplement: Source data 1. [file elife-57051-data1.xlsx]

## Sheet: Overview of samples
Sample count per time and type
Time	Samples
Vaginal
Week_24	657
Week_36	665
Fecal
One_week	533
One_month	575
One_year	580
Airway
One_week	526
One_month	606
Three_months	614
ASVs observed per compartment
Compartment	ASVs
Vaginal	3287
Fecal	6818
Airways	7500
Summary stats for compartment
	Count					Observed Richness
Type	Median	Mean	SD	Q25	Q75	Median	Mean	SD	Min	Max	Q25	Q75
Vaginal	50121	53875.3	23442.5	38329.8	64631.5	20	25	18.8	2	167	12	32
Fecal	50014.5	55171.8	38967.9	30132.2	75199	37	45.2	27.3	6	298	26	60
Airway	51232	54496.2	35433.9	29259.2	73810.5	26	28.8	15.6	1	231	19	36
Summary stats for compartment/timepoint
		Count					Observed Richness
Type	Time	Median	Mean	SD	Q25	Q75	Median	Mean	SD	Min	Max	Q25	Q75
Vaginal	Week_24	49918	53074.2	23023.6	37689	63701	20	25.3	17.9	2	125	13	32
Vaginal	Week_36	50341	54666.7	23840	38704	65933	19	24.7	19.7	2	167	11	31
Fecal	One_week	53540	59559.5	44625.8	23051	91744	29	32.1	19.1	8	298	22	37
Fecal	One_month	51612	57232.7	41400.8	33938.5	75985.5	29	31.9	15	6	175	22	39
Fecal	One_year	47810	49096.4	28920.9	31266	63858.5	67	70.5	25.3	12	175	54	84.2
Airway	One_week	45304.5	51252.8	35794.3	23772.5	72282.2	20	22.6	13.3	2	231	16	26
Airway	One_month	58918	60030.7	35014.2	40285.5	77725.5	27	29.1	16.2	3	226	20	35
Airway	Three_months	46566	51812.3	34933.3	27468.2	70207.2	33	34	14.9	1	114	24	44

## Sheet: Observed vaginal ASV's
Count of phyla, genera, and ASV in vaginal samples
Included	Phylum	Genus	ASV
All	28	463	3287
> 0.01%	16	193	958
> 0.1%	10	94	420
> 1%	8	41	173
Average abundance according to phylum
Kingdom	Phylum	taxprc
Bacteria	Firmicutes	85.2
Bacteria	Actinobacteria	12
Bacteria	Proteobacteria	1.5
Bacteria	Bacteroidetes	0.8
Bacteria	Fusobacteria	0.2
Bacteria	Tenericutes	0.1
Average abundance according to genus
Kingdom	Phylum	Class	Order	Family	Genus	taxprc
Bacteria	Firmicutes	Bacilli	Lactobacillales	Lactobacillaceae	Lactobacillus	81.1
Bacteria	Actinobacteria	Actinobacteria	Bifidobacteriales	Bifidobacteriaceae	Gardnerella	9
Bacteria	Actinobacteria	Actinobacteria	Bifidobacteriales	Bifidobacteriaceae	Bifidobacterium	1.4
Bacteria	Actinobacteria	Coriobacteriia	Coriobacteriales	Atopobiaceae	Atopobium	1.3
Bacteria	Proteobacteria	Gammaproteobacteria	Enterobacteriales	Enterobacteriaceae	Escherichia_Shigella	1.2
Bacteria	Firmicutes	Negativicutes	Selenomonadales	Veillonellaceae	Megasphaera	0.9
Average abundance according to ASV
Kingdom	Phylum	Class	Order	Family	Genus	Species	name	taxprc
Bacteria	Firmicutes	Bacilli	Lactobacillales	Lactobacillaceae	Lactobacillus	Genus_Lactobacillus	Genus_Lactobacillus_323	31.5
Bacteria	Firmicutes	Bacilli	Lactobacillales	Lactobacillaceae	Lactobacillus	Genus_Lactobacillus	Genus_Lactobacillus_139	29.5
Bacteria	Firmicutes	Bacilli	Lactobacillales	Lactobacillaceae	Lactobacillus	Lactobacillus_gasseri	Lactobacillus_gasseri_37	10.4
Bacteria	Actinobacteria	Actinobacteria	Bifidobacteriales	Bifidobacteriaceae	Gardnerella	Genus_Gardnerella	Genus_Gardnerella_40	4.6
Bacteria	Firmicutes	Bacilli	Lactobacillales	Lactobacillaceae	Lactobacillus	Genus_Lactobacillus	Genus_Lactobacillus_268	4.5
Bacteria	Actinobacteria	Actinobacteria	Bifidobacteriales	Bifidobacteriaceae	Gardnerella	Genus_Gardnerella	Genus_Gardnerella_20	3.8

## Sheet: CST composition and stability
Observed richness and shannon diversity index (SDI) for each CST
		Observed Richness		Shannon Diversity index
CST	Samples (n)	Mean	SD	Mean	SD
CST_I	479	13.44	10.68	0.48	0.47
CST_II	172	18.31	15.68	0.9	0.61
CST_III	446	12.37	9.85	0.55	0.52
CST_IV_a	86	22.21	15.79	1.3	0.71
CST_IV_b	68	19.82	14.53	1.23	0.59
CST_V	71	14.32	11.44	0.89	0.47
Top five Phylums / Genus / ASVs for each CST
		Genus		ASV
Phylum
Rank	Phylum	Abundance (%)	Genus	Abundance (%)	ASV	Abundance (%)
CST I
1	Firmicutes	94.95	Lactobacillus	91.94	Genus_Lactobacillus_323	84.35
2	Actinobacteria	3.32	Bifidobacterium	1.84	Genus_Lactobacillus_139	2.6
3	Proteobacteria	1.25	Enterococcus	1.11	Genus_Bifidobacterium_60	1.54
4	Bacteroidetes	0.27	Escherichia_Shigella	1.02	Genus_Enterococcus_34	1.15
5	Tenericutes	0.12	Gardnerella	0.96	Genus_Escherichia_Shigella_101	0.85
CST II
1	Firmicutes	84.91	Lactobacillus	80.21	Lactobacillus_gasseri_37	70.65
2	Actinobacteria	11.54	Gardnerella	6.85	Genus_Gardnerella_40	4.04
3	Proteobacteria	1.94	Bifidobacterium	2.69	Genus_Gardnerella_20	2.49
4	Bacteroidetes	1.31	Escherichia_Shigella	1.6	Genus_Bifidobacterium_60	2.44
5	Epsilonbacteraeota	0.17	Atopobium	1.36	Lactobacillus_gasseri_47	2.24
CST III
1	Firmicutes	92.34	Lactobacillus	89.23	Genus_Lactobacillus_139	81.17
2	Actinobacteria	5.03	Gardnerella	3.67	Genus_Lactobacillus_268	2.55
3	Proteobacteria	1.69	Escherichia_Shigella	1.2	Genus_Lactobacillus_323	2.03
4	Bacteroidetes	0.48	Megasphaera	0.93	Genus_Gardnerella_20	1.55
5	Fusobacteria	0.34	Bifidobacterium	0.85	Genus_Gardnerella_40	1.53
CST IV a
1	Actinobacteria	62.4	Gardnerella	58.26	Genus_Gardnerella_40	51.17
2	Firmicutes	32.2	Lactobacillus	19.53	Genus_Gardnerella_20	6.17
3	Bacteroidetes	2.84	Megasphaera	5.52	Genus_Megasphaera_22	5.33
4	Fusobacteria	0.88	Atopobium	3.57	Genus_Lactobacillus_139	4.82
5	Proteobacteria	0.82	Prevotella	2.54	Lactobacillus_gasseri_37	3.96
CST IV b
1	Actinobacteria	61.31	Gardnerella	46.75	Genus_Gardnerella_20	45.28
2	Firmicutes	32.48	Lactobacillus	24.44	Genus_Atopobium_36	12.89
3	Proteobacteria	2.76	Atopobium	12.64	Lactobacillus_gasseri_37	12.84
4	Bacteroidetes	2.42	Escherichia_Shigella	2.55	Genus_Lactobacillus_323	2.64
5	Fusobacteria	0.59	Prevotella	2.26	Genus_Escherichia_Shigella_101	2.59
CST V
1	Firmicutes	89.33	Lactobacillus	87.62	Genus_Lactobacillus_268	60.76
2	Actinobacteria	7.93	Gardnerella	6.09	Genus_Lactobacillus_139	20.64
3	Proteobacteria	1.41	Atopobium	1.62	Genus_Gardnerella_20	2.69
4	Bacteroidetes	1	Prevotella	0.95	Genus_Gardnerella_7	2.01
5	Epsilonbacteraeota	0.2	Escherichia_Shigella	0.89	Genus_Lactobacillus_265	1.71
overall stability of CSTs from week 24 to week 36
Women	In same (%)	Changed (%)
657	562 (85.5)	95 (14.5)
CST dependent stability from week 24 to week 36
CST	Time point (week)	Women	In same (%)
CST_I	24	239	221 (92.5)
CST_I	36	237	221 (93.2)
CST_II	24	86	70 (81.4)
CST_II	36	84	70 (83.3)
CST_III	24	213	194 (91.1)
CST_III	36	232	194 (83.6)
CST_IV_a	24	45	30 (66.7)
CST_IV_a	36	41	30 (73.2)
CST_IV_b	24	35	21 (60.0)
CST_IV_b	36	31	21 (67.7)
CST_V	24	39	26 (66.7)
CST_V	36	32	26 (81.2)
Distance from week 24 to week 36 samples within pairs (internal) and to randomly paired women (external, # permutations = 2500)
		Median distance
Distance metric	pairs	internal	external	Ratio*	p-value
jsd	657	0.0309	0.63491	20.5465	0.0004
wuf	657	0.00258	0.00974	3.77142	0.0004
* external / internal distance
Stability between week 24 and week 36 dependent on week 24 CST
CST	Samples (n)	Median distance
Jensen-Shannon divergence
CST_I	239	0.0232
CST_II	86	0.0639
CST_III	213	0.022
CST_IV_a	45	0.0763
CST_IV_b	35	0.0927
CST_V	39	0.068
Weighted UniFrac distances
CST_I	239	0.0016
CST_II	86	0.016
CST_III	213	0.0014
CST_IV_a	45	0.0057
CST_IV_b	35	0.0095
CST_V	39	0.0039
Inference (kruskal walis) for differences in stability between week 24 and week 36 dependent on week 24 CST
Distance metric	Rank sum statistic	p-value	degrees of freedom
jsd	49.6	1.66e-09	5
wuf	143	4.02e-29	5

## Sheet: Delivery mode
Summary of delivery mode
	Children
Delivery	n	%
Vaginal	519	79.8
In labor CS	68	10.5
Scheduled CS	63	9.7

## Sheet: Airway microbiome
Abundance of phyla, genera, and ASV in airway samples
Included	Phylum	Genus	ASV
All	35	828	7500
> 0.01%	13	107	288
> 0.1%	8	37	58
> 1%	4	10	13
Average abundance according to phylum
Kingdom	Phylum	Abundance (%)
Bacteria	Firmicutes	60.8
Bacteria	Proteobacteria	30.4
Bacteria	Actinobacteria	5.5
Bacteria	Bacteroidetes	1.7
Bacteria	Fusobacteria	0.7
Bacteria	Cyanobacteria	0.3
Average abundance according to genus
Kingdom	Phylum	Class	Order	Family	Genus	Abundance (%)
Bacteria	Firmicutes	Bacilli	Bacillales	Staphylococcaceae	Staphylococcus	25.6
Bacteria	Firmicutes	Bacilli	Lactobacillales	Streptococcaceae	Streptococcus	25.6
Bacteria	Proteobacteria	Gammaproteobacteria	Pseudomonadales	Moraxellaceae	Moraxella	14.8
Bacteria	Proteobacteria	Gammaproteobacteria	Pasteurellales	Pasteurellaceae	Haemophilus	6
Bacteria	Actinobacteria	Actinobacteria	Corynebacteriales	Corynebacteriaceae	Corynebacterium	4.1
Bacteria	Firmicutes	Bacilli	Bacillales	Bacillales_family_XI	Gemella	3.2
Average abundance according to ASV
Kingdom	Phylum	Class	Order	Family	Genus	Species	ASV	Abundance (%)
Bacteria	Firmicutes	Bacilli	Bacillales	Staphylococcaceae	Staphylococcus	Genus_Staphylococcus	Genus_Staphylococcus_205	24.2
Bacteria	Firmicutes	Bacilli	Lactobacillales	Streptococcaceae	Streptococcus	Genus_Streptococcus	Genus_Streptococcus_177	18.4
Bacteria	Proteobacteria	Gammaproteobacteria	Pseudomonadales	Moraxellaceae	Moraxella	Genus_Moraxella	Genus_Moraxella_95	13.7
Bacteria	Proteobacteria	Gammaproteobacteria	Pasteurellales	Pasteurellaceae	Haemophilus	Genus_Haemophilus	Genus_Haemophilus_69	3.5
Bacteria	Firmicutes	Bacilli	Lactobacillales	Streptococcaceae	Streptococcus	Streptococcus_pneumoniae	Streptococcus_pneumoniae_98	3.4
Bacteria	Firmicutes	Bacilli	Bacillales	Bacillales_family_XI	Gemella	Genus_Gemella	Genus_Gemella_53	3.1
Summary of alpha diversity by time
		Observed Richness		Shannon Diversity index
Time	Samples (n)	Mean	SD	Mean	SD
One_week	526	16.58	9.532	1.114	0.635
One_month	606	20.467	11.292	1.326	0.612
Three_months	614	25.125	11.103	1.518	0.63
Summary of alpha diversity by time and delivery
		Observed Richness		Shannon Diversity index
Delivery mode	Samples (n)	Mean	SD	Mean	SD
One_week
In labor CS	50	15.74	5.83	1.002	0.644
Scheduled CS	52	15.462	6.314	1.11	0.668
Vaginal	424	16.816	10.185	1.128	0.629
One_month
In labor CS	64	20.703	8.883	1.446	0.698
Scheduled CS	62	17.855	7.149	1.289	0.568
Vaginal	480	20.773	11.966	1.315	0.605
Three_months
In labor CS	65	25.677	11.741	1.56	0.663
Scheduled CS	60	22.75	10.388	1.462	0.653
Vaginal	489	25.344	11.088	1.519	0.624
Outliers not plotted in Figure 2B (Observed richness > 100)
Child	Time point	Delivery	Mother’s CST (week 36)	Observed richness
dyad464	One_month	Vaginal	CST_I	126
dyad342	One_month	Vaginal	CST_I	153
dyad408	One_week	Vaginal	CST_III	145

## Sheet: Fecal microbiome
Count of phyla, genera, and ASV in fecal samples
Included	Phylum	Genus	ASV
All	33	707	6818
> 0.01%	8	105	306
> 0.1%	5	44	87
> 1%	5	14	22
Average abundance according to phylum
Kingdom	Phylum	Abundance (%)
Bacteria	Bacteroidetes	34.4
Bacteria	Proteobacteria	26.4
Bacteria	Firmicutes	21.4
Bacteria	Actinobacteria	16.2
Bacteria	Verrucomicrobia	1.4
Bacteria	Fusobacteria	0.1
Average abundance according to genus
Kingdom	Phylum	Class	Order	Family	Genus	Abundance (%)
Bacteria	Bacteroidetes	Bacteroidia	Bacteroidales	Bacteroidaceae	Bacteroides	29.2
Bacteria	Actinobacteria	Actinobacteria	Bifidobacteriales	Bifidobacteriaceae	Bifidobacterium	15.6
Bacteria	Proteobacteria	Gammaproteobacteria	Enterobacteriales	Enterobacteriaceae	Escherichia_Shigella	14.1
Bacteria	Proteobacteria	Gammaproteobacteria	Enterobacteriales	Enterobacteriaceae	Family_Enterobacteriaceae	9.2
Bacteria	Firmicutes	Negativicutes	Selenomonadales	Veillonellaceae	Veillonella	3.3
Bacteria	Firmicutes	Clostridia	Clostridiales	Clostridiaceae_1	Clostridium_ss_1	3
Average abundance according to ASV
Kingdom	Phylum	Class	Order	Family	Genus	Species	ASV	Abundance (%)
Bacteria	Proteobacteria	Gammaproteobacteria	Enterobacteriales	Enterobacteriaceae	Escherichia_Shigella	Genus_Escherichia_Shigella	Genus_Escherichia_Shigella_101	13.2
Bacteria	Actinobacteria	Actinobacteria	Bifidobacteriales	Bifidobacteriaceae	Bifidobacterium	Genus_Bifidobacterium	Genus_Bifidobacterium_60	10
Bacteria	Bacteroidetes	Bacteroidia	Bacteroidales	Bacteroidaceae	Bacteroides	Bacteroides_fragilis	Bacteroides_fragilis_22	6.6
Bacteria	Bacteroidetes	Bacteroidia	Bacteroidales	Bacteroidaceae	Bacteroides	Genus_Bacteroides	Genus_Bacteroides_293	6.3
Bacteria	Bacteroidetes	Bacteroidia	Bacteroidales	Bacteroidaceae	Bacteroides	Genus_Bacteroides	Genus_Bacteroides_260	5.1
Bacteria	Proteobacteria	Gammaproteobacteria	Enterobacteriales	Enterobacteriaceae	Family_Enterobacteriaceae	Family_Enterobacteriaceae	Family_Enterobacteriaceae_63	4.6
Summary of alpha diversity by time
		Observed Richness		Shannon Diversity index
Time	Samples (n)	Mean	SD	Mean	SD
One_week	533	23.206	14.263	1.515	0.614
One_month	575	22.101	9.367	1.4	0.541
One_year	580	53.15	18.538	2.327	0.597
Summary of alpha diversity by time and delivery
		Observed Richness		Shannon Diversity index
Delivery mode	Samples (n)	Mean	SD	Mean	SD
One_week
In labor CS	56	23.482	11.557	1.473	0.658
Scheduled CS	51	25.725	32.563	1.563	0.773
Vaginal	426	22.869	10.57	1.515	0.588
One_month
In labor CS	64	21.672	8.142	1.301	0.47
Scheduled CS	50	21.54	9.008	1.399	0.596
Vaginal	461	22.221	9.576	1.414	0.543
One_year
In labor CS	60	49.883	18.762	2.271	0.666
Scheduled CS	54	53.13	18.763	2.329	0.611
Vaginal	466	53.573	18.482	2.335	0.587
Outlier not plotted in Figure 3B (Observed richness > 150)
Child	Time point	Delivery	Mother’s CST (week 36)	Observed richness
dyad734	One_week	Scheduled CS	CST_II	246

## Sheet: Overview of testable ASVs
Table 1: Individual transfer models, coverage of testable ASVs and strongest results
			Relative abundance*		Minimum p-value†		ASVs with p-value below cutoff†
Time	Type	ASVs(n)	Mother	Child	crude	adjusted	crude < 0.01	crude < 0.05	adjusted < 0.05	adjusted < 0.1
Cesarean sectio
7	Airways	104	30.994	36.451	0.058	0.99	0	0	0	0
7	Fecal	160	31.606	73.259	0	0.008	3	5	1	1
30	Airways	131	56.383	84.976	0.008	0.347	3	6	0	0
30	Fecal	181	60.471	83.228	0.008	0.991	1	4	0	0
90	Airways	152	56.791	84.419	0.033	0.992	0	3	0	0
300	Fecal	161	61.669	59.292	0.018	0.991	0	2	0	0
Vaginal delivery
7	Airways	293	63.97	45.965	0.002	0.691	3	13	0	0
7	Fecal	354	65.154	90.692	0	0.012	12	28	2	4
30	Airways	342	63.859	90.155	0	0.001	8	14	1	2
30	Fecal	395	65.809	92.392	0.002	0.312	11	28	0	0
90	Airways	364	62.224	87.668	0.001	0.26	3	9	0	0
300	Fecal	404	64.182	84.451	0.003	0.457	7	17	0	0
* Mean relative abundance of the testable ASVs in mother or child
† Crude p-values are the direct output of each transfer model, adjusted p-values have been FDR adjusted
Individual transfermodels, coverage of testable ASVs and strongest results for in labor and scheduled CS
			Relative abundance*		Minimum p-value†		ASVs with p-value below cutoff†
Time	Type	ASVs(n)	Mother	Child	crude	adjusted	crude < 0.01	crude < 0.05	adjusted < 0.05	adjusted < 0.1
In labor cesarean sectio
7	Airways	65	20.616	16.849	0.171	0.98	0	0	0	0
7	Fecal	105	21.214	63.576	0.001	0.068	1	2	0	1
30	Airways	81	50.822	59.373	0.005	0.374	1	4	0	0
30	Fecal	121	55.91	75.822	0.016	0.984	0	3	0	0
90	Airways	105	50.661	85.466	0.052	0.985	0	0	0	0
300	Fecal	100	58.004	50.603	0.017	0.983	0	4	0	0
Scheduled cesarean sectio
7	Airways	58	30.109	36.183	0.038	0.981	0	1	0	0
7	Fecal	89	28.119	58.184	0.02	0.873	0	3	0	0
30	Airways	75	23.747	81.034	0.016	0.984	0	2	0	0
30	Fecal	107	30.836	46.935	0.037	0.98	0	1	0	0
90	Airways	87	28.459	76.014	0.033	0.983	0	1	0	0
300	Fecal	91	35.645	33.86	0.054	0.981	0	0	0	0
* Mean relative abundance of the testable ASVs in mother or child
† Crude p-values are the direct output of each transfer model, adjusted p-values have been FDR adjusted
Transfer models that were significant after FDR correction
			Counts*				Taxonomy
Time	Type	Delivery	0/0	1/0	0/1	2020-01-01	Phylum	Class	Order	Family	Genus	Species	ASV
7	Fecal	CS	102	2	0	3	Proteobacteria	Gammaproteobacteria	Enterobacteriales	Enterobacteriaceae	Escherichia_Shigella	Genus_Escherichia_Shigella	Genus_Escherichia_Shigella_145
7	Fecal	Vaginal	423	1	0	2	Proteobacteria	Gammaproteobacteria	Cardiobacteriales	Wohlfahrtiimonadaceae	Koukoulia	Genus_Koukoulia	Genus_Koukoulia_3
7	Fecal	Vaginal	265	144	3	14	Bacteroidetes	Bacteroidia	Bacteroidales	Prevotellaceae	Prevotella	Genus_Prevotella	Genus_Prevotella_20
30	Airways	Vaginal	284	149	14	33	Tenericutes	Mollicutes	Mycoplasmatales	Mycoplasmataceae	Ureaplasma	Genus_Ureaplasma	Genus_Ureaplasma_8
* Count of pairs in which the ASV is not found (0/0), found only in the mother (1/0), only in the child (0/1), or in both mother and child (1/1)
All transfer models for above mentioned ASVs
			Counts*				P-values†
Time	Type	Delivery	0/0	1/0	0/1	2020-01-01	crude	adjusted
Genus_Escherichia_Shigella_145
7	Airways	CS	96	5	1	0	0.95098	0.9902
7	Fecal	CS	102	2	0	3	5e-05	0.00806
30	Airways	CS	121	4	0	1	0.03968	0.8664
30	Fecal	CS	104	3	5	2	0.02977	0.99123
90	Airways	CS	120	4	1	0	0.968	0.992
300	Fecal	CS	107	3	3	1	0.13483	0.99123
7	Airways	In labor CS	47	2	1	0	0.96	0.98
7	Fecal	In labor CS	54	0	0	2	0.00065	0.06818
30	Airways	In labor CS	62	1	0	1	0.03125	0.84375
30	Fecal	In labor CS	61	1	1	1	0.062	0.98437
300	Fecal	In labor CS	57	1	1	1	0.0661	0.98333
7	Fecal	Scheduled CS	48	2	0	1	0.05882	0.98039
30	Fecal	Scheduled CS	43	2	4	1	0.27602	0.98
90	Airways	Scheduled CS	56	3	1	0	0.95	0.98333
300	Fecal	Scheduled CS	50	2	2	0	0.92662	0.98148
7	Airways	Vaginal	409	14	0	1	0.03538	0.79735
7	Fecal	Vaginal	397	18	10	1	0.39831	0.99765
30	Fecal	Vaginal	427	18	14	2	0.14909	0.99783
300	Fecal	Vaginal	443	21	2	0	0.91181	0.99785
Genus_Koukoulia_3
7	Fecal	CS	105	1	1	0	0.99065	0.99065
30	Airways	CS	123	1	2	0	0.98413	0.99206
30	Airways	Scheduled CS	60	1	1	0	0.98387	0.98387
7	Fecal	Vaginal	423	1	0	2	3e-05	0.01173
30	Airways	Vaginal	473	3	4	0	0.97516	0.99792
Genus_Prevotella_20
7	Fecal	CS	58	47	1	1	0.69829	0.99065
30	Fecal	CS	62	46	3	3	0.51872	0.99123
90	Airways	CS	68	54	2	1	0.59029	0.992
300	Fecal	CS	58	50	4	2	0.42658	0.99123
7	Fecal	In labor CS	31	23	1	1	0.67792	0.98214
30	Fecal	In labor CS	36	26	1	1	0.66964	0.98437
90	Airways	In labor CS	36	27	1	1	0.67981	0.98462
300	Fecal	In labor CS	31	25	3	1	0.41416	0.98333
30	Fecal	Scheduled CS	26	20	2	2	0.59815	0.98
90	Airways	Scheduled CS	32	27	1	0	0.55	0.98333
300	Fecal	Scheduled CS	27	25	1	1	0.73585	0.98148
7	Airways	Vaginal	268	155	1	0	0.63443	0.99764
7	Fecal	Vaginal	265	144	3	14	0.00013	0.02353
30	Airways	Vaginal	300	175	2	3	0.26749	0.99792
30	Fecal	Vaginal	268	151	27	15	0.55546	0.99783
90	Airways	Vaginal	313	172	2	2	0.44748	0.99796
300	Fecal	Vaginal	282	163	13	8	0.53032	0.99785
Genus_Ureaplasma_8
7	Airways	CS	65	35	0	2	0.1293	0.9902
30	Airways	CS	78	44	0	4	0.01944	0.63667
90	Airways	CS	79	42	1	3	0.13251	0.992
7	Airways	In labor CS	28	20	0	2	0.18857	0.98
30	Airways	In labor CS	34	27	0	3	0.09745	0.98437
90	Airways	In labor CS	34	28	1	2	0.44151	0.98462
30	Airways	Scheduled CS	44	17	0	1	0.29032	0.98387
90	Airways	Scheduled CS	45	14	0	1	0.25	0.98333
7	Airways	Vaginal	269	154	1	0	0.63679	0.99764
30	Airways	Vaginal	284	149	14	33	0	0.00081
30	Fecal	Vaginal	290	169	0	2	0.13708	0.99783
90	Airways	Vaginal	296	161	11	21	0.00071	0.25976
Transfer models which were significant after FDR are highlighted in bold
* Count of pairs in which the ASV is not found (0/0), found only in the mother (1/0), only in the child (0/1), or in both mother and child (1/1)
† Crude p-values are the direct output of each transfer model, adjusted p-values have been FDR adjusted
Inference for relation between odds for tranfers and population maternal abundance*
Delivery	Time (days)	log10(abundance)†	SE‡	p-value
Airways
CS	7	0.2101	0.1135	0.0669
CS	30	0.0193	0.095	0.8391
CS	90	-0.1157	0.0815	0.158
In labor CS	7	0.4703	0.1387	0.0012
In labor CS	30	-0.2729	0.1453	0.064
In labor CS	90	-0.1132	0.1123	0.3157
Scheduled CS	7	-0.2807	0.1431	0.0549
Scheduled CS	30	0.1851	0.1256	0.1448
Scheduled CS	90	0.1479	0.131	0.262
Vaginal	7	-0.0114	0.0559	0.8385
Vaginal	30	0.0686	0.0481	0.1543
Vaginal	90	-0.0279	0.0553	0.6142
Fecal
CS	7	0.012	0.0813	0.8832
CS	30	-0.0535	0.0722	0.4595
CS	300	-0.2048	0.0834	0.0151
In labor CS	7	0.1879	0.1319	0.1575
In labor CS	30	-0.1311	0.1018	0.2003
In labor CS	300	-0.103	0.1296	0.4287
Scheduled CS	7	-0.1708	0.108	0.1174
Scheduled CS	30	-0.057	0.1189	0.6329
Scheduled CS	300	-0.0015	0.1258	0.9903
Vaginal	7	-0.1048	0.0525	0.0466
Vaginal	30	-0.1862	0.0466	0.0001
Vaginal	300	-0.1565	0.0513	0.0024
* Linear models of maternal abundance (log10 transformed) and WTR, significant models are highlighted in bold
† Log10 transformed relative maternal abundance
‡ Standard error

## Sheet: WTR overall
Weigthed Transfer Odds as function of delivery mode, compartment and age
		Models*		Permutation stats†
Delivery	Time (days)	≥1	<1	Weigthed ratio	p-value	SE	Null distribution	WTR‡
Airways
CS	7	23	81	1.21	0.539	0.516	1.253	0.966
CS	30	32	99	2.084	0.084	0.479	1.217	1.712
CS	90	29	123	1.262	0.529	0.463	1.293	0.976
Vaginal	7	47	246	2.287	0.034	0.425	1.172	1.951
Vaginal	30	65	277	3.442	0	0.358	1.161	2.964
Vaginal	90	55	309	1.603	0.094	0.322	1.076	1.49
Fecal
CS	7	41	119	2.626	0.014	0.419	1.191	2.204
CS	30	37	144	0.927	0.778	0.408	1.206	0.768
CS	300	41	120	1.638	0.216	0.408	1.258	1.302
Vaginal	7	86	268	4.867	0	0.329	1.02	4.771
Vaginal	30	94	301	4.489	0	0.308	0.977	4.595
Vaginal	300	101	303	2.508	0.005	0.328	1.106	2.268
WTR with p-value < 0.05 are highlighted in bold
* Count of models included with OR ≥1 or <1
† Based on 1000 permutations of the model we calculated the p-value (sum(permutation ratio> weighted ratio)/1000), the standard error of log transformed permutation ratios, and the null distribution (mean permutation ratio)
‡ Reported in the study and calculated as weighted ratio/null distribution
Inference for the difference in weigted ratios between sectio- and vaginal born children
		Permutational WTRVAG/WTRCS*
Time (days)	model WTRVAG/WTRCS	median	mean	p-value
Airways
7	1.89	1.29	1.49	0.21
30	1.65	1.4	1.59	0.36
90	1.27	1.06	1.19	0.35
Fecal
7	1.85	1.52	1.63	0.31
30	4.84	1.42	1.62	0.01
300	1.53	1.15	1.3	0.27

## Sheet: WTR at order level
Number of ASVs for each taxonomic partitioning based on Order across all models
Order	min	max	total	median
Clostridiales	5	144	647	40.5
Lactobacillales	21	49	392	31
Bacteroidales	7	58	345	25.5
Selenomonadales	5	31	206	14.5
Betaproteobacteriales	6	24	154	11.5
Pseudomonadales	5	23	145	9.5
Corynebacteriales	2	22	140	11
Bifidobacteriales	5	12	103	8
Enterobacteriales	5	15	103	8.5
Bacillales	4	17	98	6.5
WTR and statistics for testable orders
			Models*			Permutation stats†
Time (days)	Type	Delivery	≥1	<1	Weigthed ratio	p-value	SE	Null distribution	WTR‡
Bacillales
7	Airways	CS	2	5	2.498	0.151	3.351	0.645	3.872
7	Airways	Vaginal	1	16	3.096	0.258	3.761	0.398	7.77
7	Fecal	CS	1	5	0.099	0.422	4.232	0.099	1
7	Fecal	Vaginal	1	9	0.013	0.697	4.207	0.986	0.013
30	Airways	CS	2	4	5.414	0.059	2.701	4.54	1.193
30	Airways	Vaginal	1	13	0.892	0.559	2.902	1.238	0.721
30	Fecal	CS	1	5	0.525	0.47	4.204	0.525	1
30	Fecal	Vaginal	1	4	0.034	0.756	3.639	0.384	0.089
90	Airways	CS	2	5	1.474	0.377	2.836	1.474	1
90	Airways	Vaginal	1	11	3.866	0.213	3.191	0.633	6.106
300	Fecal	CS	1	3	0.699	0.291	4.797	0.215	3.247
300	Fecal	Vaginal	1	3	0.279	0.508	3.81	0.298	0.936
Bacteroidales
7	Airways	CS	1	6	4.305	0.159	5.387	0.001	5146.93
7	Airways	Vaginal	2	14	1.971	0.324	3.63	1.143	1.724
7	Fecal	CS	5	11	1.943	0.421	1.94	1.561	1.245
7	Fecal	Vaginal	11	37	3.141	0.048	0.904	0.978	3.212
30	Airways	CS	1	9	0.752	0.469	3.884	0.752	1
30	Airways	Vaginal	8	21	10.037	0.006	1.887	0.965	10.4
30	Fecal	CS	4	21	0.771	0.782	1.422	1.576	0.489
30	Fecal	Vaginal	16	31	8.112	0	0.886	0.779	10.415
90	Airways	CS	2	11	2.586	0.229	2.769	0.822	3.144
90	Airways	Vaginal	5	45	0.247	0.881	1.177	0.92	0.268
300	Fecal	CS	3	23	0.406	0.935	0.857	1.337	0.304
300	Fecal	Vaginal	17	41	2.445	0.056	0.661	0.965	2.534
Betaproteobacteriales
7	Airways	CS	1	7	0.014	0.902	2.925	0.971	0.014
7	Airways	Vaginal	3	18	0.456	0.623	2.583	1.004	0.454
7	Fecal	CS	1	7	0.178	0.439	4.577	0.178	1
7	Fecal	Vaginal	3	13	12.047	0.015	3.149	0.566	21.299
30	Airways	CS	1	6	0.003	0.813	3.645	0.564	0.005
30	Airways	Vaginal	3	18	0.71	0.543	2.623	0.86	0.825
30	Fecal	CS	0	6	0	0.644	4.694	0.278	0.002
30	Fecal	Vaginal	3	11	6.114	0.042	3.09	0.385	15.891
90	Airways	CS	1	9	0.005	0.873	3.126	0.721	0.007
90	Airways	Vaginal	4	20	0.916	0.415	2.126	0.623	1.47
300	Fecal	CS	0	6	0	0.62	4.773	0.406	0.001
300	Fecal	Vaginal	3	10	5.949	0.048	2.746	0.604	9.856
Bifidobacteriales
7	Airways	CS	3	2	5.738	0.145	3.188	1.087	5.28
7	Airways	Vaginal	2	7	6.283	0.142	3.301	0.595	10.553
7	Fecal	CS	2	4	0.524	0.647	2.441	0.887	0.591
7	Fecal	Vaginal	7	5	7.699	0.052	1.659	0.928	8.299
30	Airways	CS	1	6	0.462	0.55	4.337	0.842	0.549
30	Airways	Vaginal	4	7	5.236	0.081	2.856	0.854	6.128
30	Fecal	CS	4	4	0.782	0.575	1.632	0.994	0.787
30	Fecal	Vaginal	6	6	2.479	0.186	1.598	0.729	3.399
90	Airways	CS	2	4	2.379	0.245	3.448	0.835	2.847
90	Airways	Vaginal	3	5	3.439	0.17	3.225	0.707	4.862
300	Fecal	CS	3	5	0.927	0.55	1.858	1.056	0.878
300	Fecal	Vaginal	5	6	0.437	0.668	1.711	0.951	0.46
Clostridiales
7	Airways	CS	1	4	0.129	0.604	3.557	0.703	0.183
7	Airways	Vaginal	5	31	4.257	0.125	2.426	1.447	2.943
7	Fecal	CS	6	32	1.881	0.224	1.196	0.941	1.999
7	Fecal	Vaginal	14	79	1.304	0.325	0.744	0.979	1.332
30	Airways	CS	3	14	2.374	0.265	3.108	0.858	2.767
30	Airways	Vaginal	9	38	4.584	0.058	1.696	1.345	3.408
30	Fecal	CS	4	36	0.437	0.826	0.964	1.098	0.398
30	Fecal	Vaginal	14	95	0.6	0.831	0.592	1.099	0.546
90	Airways	CS	4	15	3.305	0.176	2.436	1.373	2.406
90	Airways	Vaginal	4	54	1.284	0.444	1.017	1.158	1.109
300	Fecal	CS	18	23	5.893	0	0.735	1.239	4.756
300	Fecal	Vaginal	41	103	3.69	0.013	0.559	1.192	3.097
Corynebacteriales
7	Airways	CS	2	7	3.371	0.243	3.384	0.9	3.744
7	Airways	Vaginal	4	17	4.323	0.086	2.521	0.739	5.851
7	Fecal	CS	2	6	0.725	0.538	3.45	0.833	0.87
7	Fecal	Vaginal	3	8	4.288	0.102	2.526	0.563	7.616
30	Airways	CS	2	9	0.741	0.543	3.527	1.467	0.505
30	Airways	Vaginal	3	19	0.857	0.451	1.975	0.709	1.21
30	Fecal	CS	3	3	4.25	0.11	3.239	0.492	8.645
30	Fecal	Vaginal	4	8	1.652	0.295	2.62	0.6	2.755
90	Airways	CS	1	11	0.112	0.764	3.766	1.48	0.076
90	Airways	Vaginal	2	19	1.8	0.365	2.753	0.997	1.806
300	Fecal	CS	0	2	0.002	0.263	5.803	0.002	1
300	Fecal	Vaginal	2	3	2.716	0.213	4.757	0.333	8.153
Enterobacteriales
7	Airways	CS	1	4	1.515	0.339	4.247	0.268	5.644
7	Airways	Vaginal	4	6	5.423	0.101	3.506	0.477	11.363
7	Fecal	CS	2	5	12.677	0.061	3.332	1.001	12.669
7	Fecal	Vaginal	6	9	20.863	0.002	2.318	0.615	33.947
30	Airways	CS	2	3	14.357	0.056	4.188	0.43	33.381
30	Airways	Vaginal	4	4	38.543	0.007	3.222	0.345	111.88
30	Fecal	CS	1	9	0.325	0.661	3.523	0.825	0.394
30	Fecal	Vaginal	7	4	37.443	0.002	2.557	0.616	60.78
90	Airways	CS	2	4	3.857	0.198	3.817	0.495	7.784
90	Airways	Vaginal	2	7	13.791	0.018	3.332	0.368	37.454
300	Fecal	CS	4	3	7.967	0.105	2.969	0.771	10.334
300	Fecal	Vaginal	5	5	14.351	0.02	2.474	0.874	16.422
Lactobacillales
7	Airways	CS	1	20	0.003	0.998	1.305	1.421	0.002
7	Airways	Vaginal	7	38	2.038	0.26	0.924	1.195	1.705
7	Fecal	CS	8	16	4.863	0.039	0.985	0.994	4.892
7	Fecal	Vaginal	18	24	14.754	0	0.73	1.059	13.933
30	Airways	CS	11	13	4.006	0.051	0.945	0.967	4.141
30	Airways	Vaginal	14	35	9.293	0.003	0.866	1.363	6.819
30	Fecal	CS	6	20	1.771	0.348	1.04	1.203	1.472
30	Fecal	Vaginal	18	26	18.944	0	0.826	1.086	17.448
90	Airways	CS	4	19	0.491	0.802	1.097	1.16	0.423
90	Airways	Vaginal	10	26	7.564	0.021	1.104	1.56	4.85
300	Fecal	CS	6	16	0.577	0.746	1.174	1.197	0.482
300	Fecal	Vaginal	6	30	1.642	0.407	0.959	1.329	1.236
Pseudomonadales
7	Airways	CS	2	5	3.702	0.241	3.966	1.335	2.772
7	Airways	Vaginal	4	19	1.432	0.213	2.055	0.518	2.763
7	Fecal	CS	1	5	0.404	0.558	4.124	0.608	0.664
7	Fecal	Vaginal	3	11	0.888	0.416	3.054	0.68	1.306
30	Airways	CS	1	7	1.692	0.354	4.376	1.692	1
30	Airways	Vaginal	4	18	2.366	0.095	1.755	0.537	4.408
30	Fecal	CS	1	5	0.261	0.511	4.286	0.573	0.456
30	Fecal	Vaginal	0	12	0	0.957	2.916	0.476	0.001
90	Airways	CS	0	9	0	0.862	3.119	1.282	0
90	Airways	Vaginal	4	19	0.115	0.86	1.627	0.584	0.197
300	Fecal	CS	0	5	0	0.897	4.408	0.292	0.002
300	Fecal	Vaginal	0	10	0	0.996	4.111	0.372	0.001
Selenomonadales
7	Airways	CS	2	3	2.247	0.478	4.141	1.954	1.15
7	Airways	Vaginal	4	11	5.295	0.059	2.387	0.747	7.087
7	Fecal	CS	7	5	6.46	0.027	1.769	1.046	6.177
7	Fecal	Vaginal	11	14	19.712	0	1.284	0.788	25.02
30	Airways	CS	1	5	0.25	0.409	4.468	0.25	1
30	Airways	Vaginal	3	18	0.801	0.502	1.697	0.807	0.992
30	Fecal	CS	5	9	1.002	0.46	1.861	0.912	1.099
30	Fecal	Vaginal	6	24	2.662	0.105	1.362	0.713	3.733
90	Airways	CS	1	9	0.599	0.682	3.127	1.095	0.547
90	Airways	Vaginal	4	20	0.406	0.661	1.355	0.642	0.633
300	Fecal	CS	2	11	0.342	0.772	1.828	0.859	0.398
300	Fecal	Vaginal	7	24	3.416	0.084	1.282	0.926	3.691
WTR with p-value < 0.05 are highlighted in bold
* Count of models included with OR ≥1 or <1, and the model weighted ratio
† Based on 1000 permutations of the model we calculated the p-value (sum(permutation ratio> weighted ratio)/1000), the standard error of log transformed permutation ratios, and the null distribution (mean permutation ratio)
‡ Reported in the study and calculated as weighted ratio/null distribution. For plots this value is truncated to be between 0.625 and 16

## Sheet: WTR at order level splitting CS
Number of ASVs for each taxonomic partitioning based on Order across all models
Order	min	max	total	median
Bacteroidales	2	58	353	13
Betaproteobacteriales	3	24	173	6.5
Clostridiales	2	144	670	24
Enterobacteriales	2	15	112	5
Lactobacillales	11	49	431	16.5
Selenomonadales	3	31	219	9
WTR and statistics for testable orders
			Models*			Permutation stats†
Time (days)	Type	Delivery	≥1	<1	Weigthed ratio	p-value	SE	Null distribution	WTR‡
Bacteroidales
7	Airways	In labor CS	1	3	9.357	0.03	5.588	0.001	8329.96
7	Airways	Scheduled CS	0	3	0.002	0.214	5.532	0.002	1
7	Airways	Vaginal	2	14	1.971	0.324	3.63	1.143	1.724
7	Fecal	In labor CS	4	10	1.208	0.545	1.888	1.343	0.899
7	Fecal	Scheduled CS	1	1	2.577	0.616	5.12	5.678	0.454
7	Fecal	Vaginal	11	37	3.141	0.048	0.904	0.978	3.212
30	Airways	In labor CS	1	7	0.626	0.458	3.955	0.626	1
30	Airways	Scheduled CS	0	5	0.002	0.257	5.661	0.002	1
30	Airways	Vaginal	8	21	10.037	0.006	1.887	0.965	10.4
30	Fecal	In labor CS	5	11	2.659	0.25	1.757	1.351	1.968
30	Fecal	Scheduled CS	1	9	0.011	0.852	3.26	1.468	0.008
30	Fecal	Vaginal	16	31	8.112	0	0.886	0.779	10.415
90	Airways	In labor CS	3	7	4.385	0.224	3.088	1.297	3.382
90	Airways	Scheduled CS	1	4	1.085	0.538	4.783	2.164	0.501
90	Airways	Vaginal	5	45	0.247	0.881	1.177	0.92	0.268
300	Fecal	In labor CS	3	9	0.301	0.923	1.14	1.179	0.255
300	Fecal	Scheduled CS	2	14	0.742	0.718	1.58	1.201	0.618
300	Fecal	Vaginal	17	41	2.445	0.056	0.661	0.965	2.534
Betaproteobacteriales
7	Airways	In labor CS	1	5	0.014	0.772	3.739	0.804	0.018
7	Airways	Scheduled CS	1	4	0.027	0.731	3.443	1.71	0.016
7	Airways	Vaginal	3	18	0.456	0.623	2.583	1.004	0.454
7	Fecal	In labor CS	0	7	0.001	0.629	4.791	0.484	0.001
7	Fecal	Scheduled CS	1	2	4.014	0.121	4.762	0.066	60.803
7	Fecal	Vaginal	3	13	12.047	0.015	3.149	0.566	21.299
30	Airways	In labor CS	1	5	0.282	0.462	3.699	0.282	1
30	Airways	Scheduled CS	0	5	0.001	0.735	4.262	2.47	0
30	Airways	Vaginal	3	18	0.71	0.543	2.623	0.86	0.825
30	Fecal	In labor CS	0	5	0.001	0.396	5.455	0.001	1
30	Fecal	Scheduled CS	0	3	0.001	0.514	5.211	1.046	0.001
30	Fecal	Vaginal	3	11	6.114	0.042	3.09	0.385	15.891
90	Airways	In labor CS	0	8	0.001	0.811	3.786	1.648	0
90	Airways	Scheduled CS	1	6	0.04	0.786	3.125	1.419	0.028
90	Airways	Vaginal	4	20	0.916	0.415	2.126	0.623	1.47
300	Fecal	In labor CS	0	5	0.001	0.326	5.597	0.001	1
300	Fecal	Scheduled CS	0	4	0.001	0.491	5.257	0.001	1
300	Fecal	Vaginal	3	10	5.949	0.048	2.746	0.604	9.856
Clostridiales
7	Airways	In labor CS	0	4	0.001	0.619	4.84	1.935	0
7	Airways	Scheduled CS	1	1	0.775	0.455	5.662	0.775	1
7	Airways	Vaginal	5	31	4.257	0.125	2.426	1.447	2.943
7	Fecal	In labor CS	4	14	0.691	0.646	2.051	1.111	0.622
7	Fecal	Scheduled CS	4	22	2.688	0.237	1.435	1.264	2.126
7	Fecal	Vaginal	14	79	1.304	0.325	0.744	0.979	1.332
30	Airways	In labor CS	2	4	3.628	0.232	3.969	0.822	4.411
30	Airways	Scheduled CS	1	10	0.437	0.341	5.11	0.437	1
30	Airways	Vaginal	9	38	4.584	0.058	1.696	1.345	3.408
30	Fecal	In labor CS	4	20	1.145	0.485	1.756	1.108	1.033
30	Fecal	Scheduled CS	2	24	0.448	0.822	1.676	1.37	0.327
30	Fecal	Vaginal	14	95	0.6	0.831	0.592	1.099	0.546
90	Airways	In labor CS	1	11	1.301	0.573	3.52	1.52	0.856
90	Airways	Scheduled CS	3	8	3.155	0.253	3.892	1.22	2.585
90	Airways	Vaginal	4	54	1.284	0.444	1.017	1.158	1.109
300	Fecal	In labor CS	12	12	8.456	0.009	1.129	1.172	7.217
300	Fecal	Scheduled CS	9	10	2.613	0.156	0.943	1.192	2.192
300	Fecal	Vaginal	41	103	3.69	0.013	0.559	1.192	3.097
Enterobacteriales
7	Airways	In labor CS	2	3	2.297	0.26	4.174	0.589	3.898
7	Airways	Scheduled CS	0	2	0.001	0.824	4.53	0.068	0.021
7	Airways	Vaginal	4	6	5.423	0.101	3.506	0.477	11.363
7	Fecal	In labor CS	3	4	19.758	0.035	2.669	1.542	12.811
7	Fecal	Scheduled CS	1	2	2.329	0.593	4.076	3.192	0.73
7	Fecal	Vaginal	6	9	20.863	0.002	2.318	0.615	33.947
30	Airways	In labor CS	3	1	15.075	0.066	3.925	0.678	22.243
30	Airways	Scheduled CS	0	2	0.002	0.748	4.945	0.157	0.012
30	Airways	Vaginal	4	4	38.543	0.007	3.222	0.345	111.88
30	Fecal	In labor CS	1	4	0.631	0.545	3.952	0.707	0.893
30	Fecal	Scheduled CS	1	3	0.15	0.831	3.651	1.008	0.149
30	Fecal	Vaginal	7	4	37.443	0.002	2.557	0.616	60.78
90	Airways	In labor CS	1	3	6.447	0.078	4.41	0.278	23.176
90	Airways	Scheduled CS	1	3	1.074	0.356	4.665	0.119	9.026
90	Airways	Vaginal	2	7	13.791	0.018	3.332	0.368	37.454
300	Fecal	In labor CS	4	2	11.455	0.07	3.063	0.703	16.301
300	Fecal	Scheduled CS	1	2	2.856	0.258	5.063	2.856	1
300	Fecal	Vaginal	5	5	14.351	0.02	2.474	0.874	16.422
Lactobacillales
7	Airways	In labor CS	1	12	0.177	0.915	1.634	1.029	0.172
7	Airways	Scheduled CS	1	10	0.008	0.987	1.459	1.174	0.007
7	Airways	Vaginal	7	38	2.038	0.26	0.924	1.195	1.705
7	Fecal	In labor CS	8	10	4.576	0.077	1.131	1.202	3.806
7	Fecal	Scheduled CS	5	10	2.432	0.214	1.368	0.946	2.571
7	Fecal	Vaginal	18	24	14.754	0	0.73	1.059	13.933
30	Airways	In labor CS	9	8	4.883	0.027	0.948	0.859	5.684
30	Airways	Scheduled CS	4	9	1.945	0.286	1.542	0.947	2.053
30	Airways	Vaginal	14	35	9.293	0.003	0.866	1.363	6.819
30	Fecal	In labor CS	8	12	2.597	0.182	1.177	1.023	2.54
30	Fecal	Scheduled CS	4	12	0.919	0.632	1.435	1.31	0.701
30	Fecal	Vaginal	18	26	18.944	0	0.826	1.086	17.448
90	Airways	In labor CS	5	11	0.466	0.786	0.917	0.959	0.486
90	Airways	Scheduled CS	3	9	1.749	0.386	1.682	1.252	1.396
90	Airways	Vaginal	10	26	7.564	0.021	1.104	1.56	4.85
300	Fecal	In labor CS	5	9	2.256	0.361	1.727	1.431	1.577
300	Fecal	Scheduled CS	4	10	1.536	0.395	1.499	1.261	1.218
300	Fecal	Vaginal	6	30	1.642	0.407	0.959	1.329	1.236
Selenomonadales
7	Airways	In labor CS	0	3	0.001	0.775	4.408	0.846	0.001
7	Airways	Scheduled CS	2	1	45.411	0.004	4.54	0.322	140.939
7	Airways	Vaginal	4	11	5.295	0.059	2.387	0.747	7.087
7	Fecal	In labor CS	5	1	110.383	0.001	3.184	1.297	85.119
7	Fecal	Scheduled CS	3	3	3.372	0.194	2.869	0.917	3.677
7	Fecal	Vaginal	11	14	19.712	0	1.284	0.788	25.02
30	Airways	In labor CS	1	2	1.046	0.22	5.156	0.002	418.577
30	Airways	Scheduled CS	1	3	0.207	0.361	4.29	0.207	1
30	Airways	Vaginal	3	18	0.801	0.502	1.697	0.807	0.992
30	Fecal	In labor CS	5	4	4.816	0.098	2.122	1.059	4.547
30	Fecal	Scheduled CS	2	8	0.919	0.581	2.373	1.238	0.743
30	Fecal	Vaginal	6	24	2.662	0.105	1.362	0.713	3.733
90	Airways	In labor CS	1	5	0.681	0.685	3.388	1.518	0.448
90	Airways	Scheduled CS	0	5	0.002	0.574	4.678	0.265	0.006
90	Airways	Vaginal	4	20	0.406	0.661	1.355	0.642	0.633
300	Fecal	In labor CS	3	6	1.142	0.472	2.718	1.08	1.058
300	Fecal	Scheduled CS	0	9	0	0.918	2.699	1.029	0
300	Fecal	Vaginal	7	24	3.416	0.084	1.282	0.926	3.691
WTR with p-value < 0.05 are highlighted in bold
* Count of models included with OR ≥1 or <1, and the model weighted ratio
† Based on 1000 permutations of the model we calculated the p-value (sum(permutation ratio> weighted ratio)/1000), the standard error of log transformed permutation ratios, and the null distribution (mean permutation ratio)
‡ Reported in the study and calculated as weighted ratio/null distribution. For plots this value is truncated to be between 0.625 and 16

[truncated: 1 more sheets: Transfer mothers dominant ASVs]
