# Supplementary material for: Modeling transfer of vaginal microbiota from mother to infant in early life
Source: eLife. 2021 Jan 15;10:e57051. doi: 10.7554/eLife.57051 (PMC7810462; doi:10.7554/eLife.57051)
Supplement: Source data 2. [file elife-57051-data2.xlsx]

## Sheet: Bacteria
Kingdom	Phylum	Class	Order	Family	Genus_simple	Genus	Species	name	asw_hash	ASV	seq	SPECIES USED	SPECIES Short
Bacteria	Actinobacteria	Coriobacteriia	Coriobacteriales	Atopobiaceae	Atopobium	Atopobium	Genus_Atopobium	Genus_Atopobium_36	1c3398a24441d53ce313d7759c7fd9f2	Genus_Atopobium_36	GGGCAAGCGTTATCCGGATTCATTGGGCGTAAAGCGCGCGTAGGCGGTCTGTTAGGTCAGGAGTTAAATCTGGGGGCTCAACCCCTATCCGCTCCTGATACCGGCAGGCTTGAGTCTGGTAGGGGAAGATGGAATTCCAAGTGTAGCGGTGAAATGCGCAGATATTTGGAAGAACACCGGTGGCGAAGGCGGTCTTCTGGGCCATGACTGACGCTGAGGCGCGAAAGCTAGGGGAG	Atopobium vaginae	A. vaginae
Bacteria	Actinobacteria	Actinobacteria	Bifidobacteriales	Bifidobacteriaceae	Bifidobacterium	Bifidobacterium	Genus_Bifidobacterium	Genus_Bifidobacterium_60	6ec6d03fbef9f16e3581ccdc60e7d266	Genus_Bifidobacterium_60	GTGCAAGCGTTATCCGGAATTATTGGGCGTAAAGGGCTCGTAGGCGGTTCGTCGCGTCCGGTGTGAAAGTCCATCGCTTAACGGTGGATCCGCGCCGGGTACGGGCGGGCTTGAGTGCGGTAGGGGAGACTGGAATTCCCGGTGTAACGGTGGAATGTGTAGATATCGGGAAGAACACCAATGGCGAAGGCAGGTCTCTGGGCCGTTACTGACGCTGAGGAGCGAAAGCGTGGGGAG	Bifidobacterium longum	B. longum
Bacteria	Actinobacteria	Actinobacteria	Bifidobacteriales	Bifidobacteriaceae	Gardnerella	Gardnerella	Genus_Gardnerella	Genus_Gardnerella_20	19a083c0a0e9c5eede84da9ae3de327a	Genus_Gardnerella_20	GCGCAAGCGTTATCCGGAATTATTGGGCGTAAAGAGCTTGTAGGCGGTTCGTCGCGTCTGGTGTGAAAGCCCATCGCTTAACGGTGGGTTTGCGCCGGGTACGGGCGGGCTAGAGTGCAGTAGGGGAGACTGGAATTCTCGGTGTAACGGTGGAATGTGTAGATATCGGGAAGAACACCAATGGCGAAGGCAGGTCTCTGGGCTGTTACTGACGCTGAGAAGCGAAAGCGTGGGGAG	Gardnerella vaginalis	G. vaginalis_a
Bacteria	Actinobacteria	Actinobacteria	Bifidobacteriales	Bifidobacteriaceae	Gardnerella	Gardnerella	Genus_Gardnerella	Genus_Gardnerella_40	0c4699649b1bca69c2ecf90d80b3d714	Genus_Gardnerella_40	GCGCAAGCGTTATCCGGAATTATTGGGCGTAAAGAGCTTGTAGGCGGTTCGTCGCGTCTGGTGTGAAAGCCCATCGCTTAACGGTGGGTCTGCGCCGGGTACGGGCGGGCTAGAGTGCAGTAGGGGAGACTGGAATTCCCGGTGTAACGGTGGAATGTGTAGATATCGGGAAGAACACCAATGGCGAAGGCAGGTCTCTGGGCTGTTACTGACGCTGAGAAGCGAAAGCGTGGGGAG	Gardnerella vaginalis	G. vaginalis_b
Bacteria	Firmicutes	Bacilli	Lactobacillales	Lactobacillaceae	Lactobacillus	Lactobacillus	Genus_Lactobacillus	Genus_Lactobacillus_139	dbb3a9c3f8c94e2d5e68abf292c02dba	Genus_Lactobacillus_139	TGGCAAGCGTTGTCCGGATTTATTGGGCGTAAAGCGAGTGCAGGCGGCTCGATAAGTCTGATGTGAAAGCCTTCGGCTCAACCGGAGAATTGCATCAGAAACTGTCGAGCTTGAGTACAGAAGAGGAGAGTGGAACTCCATGTGTAGCGGTGAAATGCGTAGATATATGGAAGAACACCGGTGGCGAAGGCGGCTCTCTGGTCTGTTACTGACGCTGAGGCTCGAAAGCATGGGTAG	Lactobacillus iners	L. iners
Bacteria	Firmicutes	Bacilli	Lactobacillales	Lactobacillaceae	Lactobacillus	Lactobacillus	Genus_Lactobacillus	Genus_Lactobacillus_268	19e28f1d710bf21e4204982e643fcca2	Genus_Lactobacillus_268	TGGCAAGCGTTGTCCGGATTTATTGGGCGTAAAGCGAGCGCAGGCGGATTGATAAGTCTGATGTGAAAGCCTTCGGCTCAACCGAAGAACTGCATCAGAAACTGTCAATCTTGAGTGCAGAAGAGGAGAGTGGAACTCCATGTGTAGCGGTGGAATGCGTAGATATATGGAAGAACACCAGTGGCGAAGGCGGCTCTCTGGTCTGTAACTGACGCTGAGGCTCGAAAGCATGGGTAG	Lactobacillus jensenii	L. jensenii
Bacteria	Firmicutes	Bacilli	Lactobacillales	Lactobacillaceae	Lactobacillus	Lactobacillus	Lactobacillus_gasseri	Lactobacillus_gasseri_37	44d9fc4de8898b6c82c69654435a9f0b	Lactobacillus_gasseri_37	TGGCAAGCGTTGTCCGGATTTATTGGGCGTAAAGCGAGTGCAGGCGGTTCAATAAGTCTGATGTGAAAGCCTTCGGCTCAACCGGAGAATTGCATCAGAAACTGTTGAACTTGAGTGCAGAAGAGGAGAGTGGAACTCCATGTGTAGCGGTGGAATGCGTAGATATATGGAAGAACACCAGTGGCGAAGGCGGCTCTCTGGTCTGCAACTGACGCTGAGGCTCGAAAGCATGGGTAG	Lactobacillus gasseri	L. gasseri
Bacteria	Firmicutes	Bacilli	Lactobacillales	Lactobacillaceae	Lactobacillus	Lactobacillus	Genus_Lactobacillus	Genus_Lactobacillus_323	461839ef076a556fe1791e2de0faf2ef	Genus_Lactobacillus_323	TGGCAAGCGTTGTCCGGATTTATTGGGCGTAAAGCGAGCGCAGGCGGAAGAATAAGTCTGATGTGAAAGCCCTCGGCTTAACCGAGGAACTGCATCGGAAACTGTTTTTCTTGAGTGCAGAAGAGGAGAGTGGAACTCCATGTGTAGCGGTGGAATGCGTAGATATATGGAAGAACACCAGTGGCGAAGGCGGCTCTCTGGTCTGCAACTGACGCTGAGGCTCGAAAGCATGGGTAG	Lactobacillus crispatus	L. crispatus
Bacteria	Firmicutes	Negativicutes	Selenomonadales	Veillonellaceae	Megasphaera	Megasphaera	Genus_Megasphaera	Genus_Megasphaera_22	74873ee2f32a9c499974f178cdd9ebba	Genus_Megasphaera_22	TGGCAAGCGTTGTCCGGAATTATTGGGCGTAAAGGGCGCGCAGGCGGTTCGGTAAGTCTGTCTTAAAAGTGCGGGGCTTAACCCCGTGAGGGGACGGAAACTGTCGAACTTGAGTGTCGGAGAGGAAAGCGGAATTCCTAGTGTAGCGGTGAAATGCGTAGATATTAGGAGGAACACCGGTGGCGAAAGCGGCTTTCTGGACGACAACTGACGCTGAGGCGCGAAAGCGTGGGGAG	Megasphaera massiliensis	M. massiliensis
ASV	'Genus_Atopobium_36','Genus_Bifidobacterium_60','Genus_Gardnerella_20','Genus_Gardnerella_40','Genus_Lactobacillus_139','Genus_Lactobacillus_268','Lactobacillus_gasseri_37','Genus_Lactobacillus_323','Genus_Megasphaera_22'
Species	'A. vaginae','B. longum','G. vaginalis_a','G. vaginalis_b','L. iners','L. jensenii','L. gasseri','L. crispatus','M. massiliensis'

## Sheet: Genus_Atopobium_36
Database: 16S ribosomal RNA (Bacteria and Archaea)
21,632 sequences; 31,458,767 total letters
Query= Genus_Atopobium_36|1c3398a24441d53ce313d7759c7fd9f2
Length=236
Score E Max
Sequences producing significant alignments: (Bits) Value Ident
NR_029349.1 Atopobium vaginae strain 961*00022/98 16S ribosoma... 436 2e-122 100%
NR_117757.1 Atopobium vaginae DSM 15829 16S ribosomal RNA, par... 436 2e-122 100%
ALIGNMENTS
>NR_029349.1 Atopobium vaginae strain 961*00022/98 16S ribosomal RNA, partial
sequence
Length=1351
Score = 436 bits (236), Expect = 2e-122
Identities = 236/236 (100%), Gaps = 0/236 (0%)
Strand=Plus/Plus
Query 1 GGGCAAGCGTTATCCGGATTCATTGGGCGTAAAGCGCGCGTAGGCGGTCTGTTAGGTCAG 60
||||||||||||||||||||||||||||||||||||||||||||||||||||||||||||
Sbjct 498 GGGCAAGCGTTATCCGGATTCATTGGGCGTAAAGCGCGCGTAGGCGGTCTGTTAGGTCAG 557
Query 61 GAGTTAAATCTGGGGGCTCAACCCCTATCCGCTCCTGATACCGGCAGGCTTGAGTCTGGT 120
||||||||||||||||||||||||||||||||||||||||||||||||||||||||||||
Sbjct 558 GAGTTAAATCTGGGGGCTCAACCCCTATCCGCTCCTGATACCGGCAGGCTTGAGTCTGGT 617
Query 121 AGGGGAAGATGGAATTCCAAGTGTAGCGGTGAAATGCGCAGATATTTGGAAGAACACCGG 180
||||||||||||||||||||||||||||||||||||||||||||||||||||||||||||
Sbjct 618 AGGGGAAGATGGAATTCCAAGTGTAGCGGTGAAATGCGCAGATATTTGGAAGAACACCGG 677
Query 181 TGGCGAAGGCGGTCTTCTGGGCCATGACTGACGCTGAGGCGCGAAAGCTAGGGGAG 236
||||||||||||||||||||||||||||||||||||||||||||||||||||||||
Sbjct 678 TGGCGAAGGCGGTCTTCTGGGCCATGACTGACGCTGAGGCGCGAAAGCTAGGGGAG 733
>NR_117757.1 Atopobium vaginae DSM 15829 16S ribosomal RNA, partial sequence
Length=1331
Score = 436 bits (236), Expect = 2e-122
Identities = 236/236 (100%), Gaps = 0/236 (0%)
Strand=Plus/Plus
Query 1 GGGCAAGCGTTATCCGGATTCATTGGGCGTAAAGCGCGCGTAGGCGGTCTGTTAGGTCAG 60
||||||||||||||||||||||||||||||||||||||||||||||||||||||||||||
Sbjct 488 GGGCAAGCGTTATCCGGATTCATTGGGCGTAAAGCGCGCGTAGGCGGTCTGTTAGGTCAG 547
Query 61 GAGTTAAATCTGGGGGCTCAACCCCTATCCGCTCCTGATACCGGCAGGCTTGAGTCTGGT 120
||||||||||||||||||||||||||||||||||||||||||||||||||||||||||||
Sbjct 548 GAGTTAAATCTGGGGGCTCAACCCCTATCCGCTCCTGATACCGGCAGGCTTGAGTCTGGT 607
Query 121 AGGGGAAGATGGAATTCCAAGTGTAGCGGTGAAATGCGCAGATATTTGGAAGAACACCGG 180
||||||||||||||||||||||||||||||||||||||||||||||||||||||||||||
Sbjct 608 AGGGGAAGATGGAATTCCAAGTGTAGCGGTGAAATGCGCAGATATTTGGAAGAACACCGG 667
Query 181 TGGCGAAGGCGGTCTTCTGGGCCATGACTGACGCTGAGGCGCGAAAGCTAGGGGAG 236
||||||||||||||||||||||||||||||||||||||||||||||||||||||||
Sbjct 668 TGGCGAAGGCGGTCTTCTGGGCCATGACTGACGCTGAGGCGCGAAAGCTAGGGGAG 723

## Sheet: Genus_Bifidobacterium_60
Database: 16S ribosomal RNA (Bacteria and Archaea)
21,632 sequences; 31,458,767 total letters
Query= Genus_Bifidobacterium_60|6ec6d03fbef9f16e3581ccdc60e7d266
Length=237
Score E Max
Sequences producing significant alignments: (Bits) Value Ident
NR_043437.1 Bifidobacterium longum subsp. infantis strain ATCC... 438 6e-123 100%
NR_040783.1 Bifidobacterium breve DSM 20213 = JCM 1192 16S rib... 438 6e-123 100%
NR_145535.1 Bifidobacterium longum subsp. suillum strain Su 85... 438 6e-123 100%
NR_117506.1 Bifidobacterium longum strain KCTC 3128 16S riboso... 438 6e-123 100%
NR_044691.2 Bifidobacterium longum strain ATCC 15707 16S ribos... 435 7e-122 100%
NR_037116.1 Bifidobacterium choerinum strain Su 806 16S riboso... 433 3e-121 100%
NR_074802.2 Bifidobacterium adolescentis ATCC 15703 16S riboso... 433 3e-121 100%
NR_118589.1 Bifidobacterium stercoris JCM 15918 strain Eg1 16S... 433 3e-121 100%
NR_133982.1 Bifidobacterium faecale strain CU3-7 16S ribosomal... 433 3e-121 100%
NR_043442.2 Bifidobacterium pseudolongum strain PNC-2-9G 16S r... 433 3e-121 100%
NR_043441.2 Bifidobacterium pseudolongum subsp. globosum strai... 433 3e-121 100%
NR_116746.1 Bifidobacterium stercoris JCM 15918 strain Eg1 16S... 433 3e-121 100%
NR_113173.1 Bifidobacterium saguini DSM 23967 strain AFB23-1 1... 431 9e-121 100%
NR_037118.1 Bifidobacterium gallicum strain P6 16S ribosomal R... 427 1e-119 99%
NR_036857.1 Bifidobacterium ruminantium strain Ru 687 16S ribo... 427 1e-119 99%
NR_159261.1 Bifidobacterium callitrichidarum strain TRI 5 16S ... 427 1e-119 99%
NR_041875.1 Bifidobacterium catenulatum strain DSM 16992 16S r... 427 1e-119 99%
NR_037117.1 Bifidobacterium pseudocatenulatum strain B1279 16S... 427 1e-119 99%
NR_112779.1 Bifidobacterium kashiwanohense JCM 15439 = DSM 218... 427 1e-119 99%
ALIGNMENTS
>NR_043437.1 Bifidobacterium longum subsp. infantis strain ATCC 15697 16S
ribosomal RNA, partial sequence
Length=1515
Score = 438 bits (237), Expect = 6e-123
Identities = 237/237 (100%), Gaps = 0/237 (0%)
Strand=Plus/Plus
Query 1 GTGCAAGCGTTATCCGGAATTATTGGGCGTAAAGGGCTCGTAGGCGGTTCGTCGCGTCCG 60
||||||||||||||||||||||||||||||||||||||||||||||||||||||||||||
Sbjct 509 GTGCAAGCGTTATCCGGAATTATTGGGCGTAAAGGGCTCGTAGGCGGTTCGTCGCGTCCG 568
Query 61 GTGTGAAAGTCCATCGCTTAACGGTGGATCCGCGCCGGGTACGGGCGGGCTTGAGTGCGG 120
||||||||||||||||||||||||||||||||||||||||||||||||||||||||||||
Sbjct 569 GTGTGAAAGTCCATCGCTTAACGGTGGATCCGCGCCGGGTACGGGCGGGCTTGAGTGCGG 628
Query 121 TAGGGGAGACTGGAATTCCCGGTGTAACGGTGGAATGTGTAGATATCGGGAAGAACACCA 180
||||||||||||||||||||||||||||||||||||||||||||||||||||||||||||
Sbjct 629 TAGGGGAGACTGGAATTCCCGGTGTAACGGTGGAATGTGTAGATATCGGGAAGAACACCA 688
Query 181 ATGGCGAAGGCAGGTCTCTGGGCCGTTACTGACGCTGAGGAGCGAAAGCGTGGGGAG 237
|||||||||||||||||||||||||||||||||||||||||||||||||||||||||
Sbjct 689 ATGGCGAAGGCAGGTCTCTGGGCCGTTACTGACGCTGAGGAGCGAAAGCGTGGGGAG 745
>NR_040783.1 Bifidobacterium breve DSM 20213 = JCM 1192 16S ribosomal RNA,
partial sequence
Length=1520
Score = 438 bits (237), Expect = 6e-123
Identities = 237/237 (100%), Gaps = 0/237 (0%)
Strand=Plus/Plus
Query 1 GTGCAAGCGTTATCCGGAATTATTGGGCGTAAAGGGCTCGTAGGCGGTTCGTCGCGTCCG 60
||||||||||||||||||||||||||||||||||||||||||||||||||||||||||||
Sbjct 514 GTGCAAGCGTTATCCGGAATTATTGGGCGTAAAGGGCTCGTAGGCGGTTCGTCGCGTCCG 573
Query 61 GTGTGAAAGTCCATCGCTTAACGGTGGATCCGCGCCGGGTACGGGCGGGCTTGAGTGCGG 120
||||||||||||||||||||||||||||||||||||||||||||||||||||||||||||
Sbjct 574 GTGTGAAAGTCCATCGCTTAACGGTGGATCCGCGCCGGGTACGGGCGGGCTTGAGTGCGG 633
Query 121 TAGGGGAGACTGGAATTCCCGGTGTAACGGTGGAATGTGTAGATATCGGGAAGAACACCA 180
||||||||||||||||||||||||||||||||||||||||||||||||||||||||||||
Sbjct 634 TAGGGGAGACTGGAATTCCCGGTGTAACGGTGGAATGTGTAGATATCGGGAAGAACACCA 693
Query 181 ATGGCGAAGGCAGGTCTCTGGGCCGTTACTGACGCTGAGGAGCGAAAGCGTGGGGAG 237
|||||||||||||||||||||||||||||||||||||||||||||||||||||||||
Sbjct 694 ATGGCGAAGGCAGGTCTCTGGGCCGTTACTGACGCTGAGGAGCGAAAGCGTGGGGAG 750
>NR_145535.1 Bifidobacterium longum subsp. suillum strain Su 851 16S ribosomal
RNA, partial sequence
Length=1494
Score = 438 bits (237), Expect = 6e-123
Identities = 237/237 (100%), Gaps = 0/237 (0%)
Strand=Plus/Plus
Query 1 GTGCAAGCGTTATCCGGAATTATTGGGCGTAAAGGGCTCGTAGGCGGTTCGTCGCGTCCG 60
||||||||||||||||||||||||||||||||||||||||||||||||||||||||||||
Sbjct 500 GTGCAAGCGTTATCCGGAATTATTGGGCGTAAAGGGCTCGTAGGCGGTTCGTCGCGTCCG 559
Query 61 GTGTGAAAGTCCATCGCTTAACGGTGGATCCGCGCCGGGTACGGGCGGGCTTGAGTGCGG 120
||||||||||||||||||||||||||||||||||||||||||||||||||||||||||||
Sbjct 560 GTGTGAAAGTCCATCGCTTAACGGTGGATCCGCGCCGGGTACGGGCGGGCTTGAGTGCGG 619
Query 121 TAGGGGAGACTGGAATTCCCGGTGTAACGGTGGAATGTGTAGATATCGGGAAGAACACCA 180
||||||||||||||||||||||||||||||||||||||||||||||||||||||||||||
Sbjct 620 TAGGGGAGACTGGAATTCCCGGTGTAACGGTGGAATGTGTAGATATCGGGAAGAACACCA 679
Query 181 ATGGCGAAGGCAGGTCTCTGGGCCGTTACTGACGCTGAGGAGCGAAAGCGTGGGGAG 237
|||||||||||||||||||||||||||||||||||||||||||||||||||||||||
Sbjct 680 ATGGCGAAGGCAGGTCTCTGGGCCGTTACTGACGCTGAGGAGCGAAAGCGTGGGGAG 736
>NR_117506.1 Bifidobacterium longum strain KCTC 3128 16S ribosomal RNA, partial
sequence
Length=1477
Score = 438 bits (237), Expect = 6e-123
Identities = 237/237 (100%), Gaps = 0/237 (0%)
Strand=Plus/Plus
Query 1 GTGCAAGCGTTATCCGGAATTATTGGGCGTAAAGGGCTCGTAGGCGGTTCGTCGCGTCCG 60
||||||||||||||||||||||||||||||||||||||||||||||||||||||||||||
Sbjct 492 GTGCAAGCGTTATCCGGAATTATTGGGCGTAAAGGGCTCGTAGGCGGTTCGTCGCGTCCG 551
Query 61 GTGTGAAAGTCCATCGCTTAACGGTGGATCCGCGCCGGGTACGGGCGGGCTTGAGTGCGG 120
||||||||||||||||||||||||||||||||||||||||||||||||||||||||||||
Sbjct 552 GTGTGAAAGTCCATCGCTTAACGGTGGATCCGCGCCGGGTACGGGCGGGCTTGAGTGCGG 611
Query 121 TAGGGGAGACTGGAATTCCCGGTGTAACGGTGGAATGTGTAGATATCGGGAAGAACACCA 180
||||||||||||||||||||||||||||||||||||||||||||||||||||||||||||
Sbjct 612 TAGGGGAGACTGGAATTCCCGGTGTAACGGTGGAATGTGTAGATATCGGGAAGAACACCA 671
Query 181 ATGGCGAAGGCAGGTCTCTGGGCCGTTACTGACGCTGAGGAGCGAAAGCGTGGGGAG 237
|||||||||||||||||||||||||||||||||||||||||||||||||||||||||
Sbjct 672 ATGGCGAAGGCAGGTCTCTGGGCCGTTACTGACGCTGAGGAGCGAAAGCGTGGGGAG 728
>NR_044691.2 Bifidobacterium longum strain ATCC 15707 16S ribosomal RNA, partial
sequence
Length=1476
Score = 435 bits (235), Expect = 7e-122
Identities = 236/237 (99%), Gaps = 0/237 (0%)
Strand=Plus/Plus
Query 1 GTGCAAGCGTTATCCGGAATTATTGGGCGTAAAGGGCTCGTAGGCGGTTCGTCGCGTCCG 60
|||| |||||||||||||||||||||||||||||||||||||||||||||||||||||||
Sbjct 522 GTGCNAGCGTTATCCGGAATTATTGGGCGTAAAGGGCTCGTAGGCGGTTCGTCGCGTCCG 581
Query 61 GTGTGAAAGTCCATCGCTTAACGGTGGATCCGCGCCGGGTACGGGCGGGCTTGAGTGCGG 120
||||||||||||||||||||||||||||||||||||||||||||||||||||||||||||
Sbjct 582 GTGTGAAAGTCCATCGCTTAACGGTGGATCCGCGCCGGGTACGGGCGGGCTTGAGTGCGG 641
Query 121 TAGGGGAGACTGGAATTCCCGGTGTAACGGTGGAATGTGTAGATATCGGGAAGAACACCA 180
||||||||||||||||||||||||||||||||||||||||||||||||||||||||||||
Sbjct 642 TAGGGGAGACTGGAATTCCCGGTGTAACGGTGGAATGTGTAGATATCGGGAAGAACACCA 701
Query 181 ATGGCGAAGGCAGGTCTCTGGGCCGTTACTGACGCTGAGGAGCGAAAGCGTGGGGAG 237
|||||||||||||||||||||||||||||||||||||||||||||||||||||||||
Sbjct 702 ATGGCGAAGGCAGGTCTCTGGGCCGTTACTGACGCTGAGGAGCGAAAGCGTGGGGAG 758
>NR_037116.1 Bifidobacterium choerinum strain Su 806 16S ribosomal RNA, partial
sequence
Length=1530
Score = 433 bits (234), Expect = 3e-121
Identities = 236/237 (99%), Gaps = 0/237 (0%)
Strand=Plus/Plus
Query 1 GTGCAAGCGTTATCCGGAATTATTGGGCGTAAAGGGCTCGTAGGCGGTTCGTCGCGTCCG 60
|||||||||||||||||| |||||||||||||||||||||||||||||||||||||||||
Sbjct 522 GTGCAAGCGTTATCCGGATTTATTGGGCGTAAAGGGCTCGTAGGCGGTTCGTCGCGTCCG 581
Query 61 GTGTGAAAGTCCATCGCTTAACGGTGGATCCGCGCCGGGTACGGGCGGGCTTGAGTGCGG 120
||||||||||||||||||||||||||||||||||||||||||||||||||||||||||||
Sbjct 582 GTGTGAAAGTCCATCGCTTAACGGTGGATCCGCGCCGGGTACGGGCGGGCTTGAGTGCGG 641
Query 121 TAGGGGAGACTGGAATTCCCGGTGTAACGGTGGAATGTGTAGATATCGGGAAGAACACCA 180
||||||||||||||||||||||||||||||||||||||||||||||||||||||||||||
Sbjct 642 TAGGGGAGACTGGAATTCCCGGTGTAACGGTGGAATGTGTAGATATCGGGAAGAACACCA 701
Query 181 ATGGCGAAGGCAGGTCTCTGGGCCGTTACTGACGCTGAGGAGCGAAAGCGTGGGGAG 237
|||||||||||||||||||||||||||||||||||||||||||||||||||||||||
Sbjct 702 ATGGCGAAGGCAGGTCTCTGGGCCGTTACTGACGCTGAGGAGCGAAAGCGTGGGGAG 758
>NR_074802.2 Bifidobacterium adolescentis ATCC 15703 16S ribosomal RNA, complete
sequence
Length=1530
Score = 433 bits (234), Expect = 3e-121
Identities = 236/237 (99%), Gaps = 0/237 (0%)
Strand=Plus/Plus
Query 1 GTGCAAGCGTTATCCGGAATTATTGGGCGTAAAGGGCTCGTAGGCGGTTCGTCGCGTCCG 60
||||||||||||||||||||||||||||||||||||||||||||||||||||||||||||
Sbjct 526 GTGCAAGCGTTATCCGGAATTATTGGGCGTAAAGGGCTCGTAGGCGGTTCGTCGCGTCCG 585
Query 61 GTGTGAAAGTCCATCGCTTAACGGTGGATCCGCGCCGGGTACGGGCGGGCTTGAGTGCGG 120
||||||||||||||||||||||||||||||||||||||||||||||||||||||||||||
Sbjct 586 GTGTGAAAGTCCATCGCTTAACGGTGGATCCGCGCCGGGTACGGGCGGGCTTGAGTGCGG 645
Query 121 TAGGGGAGACTGGAATTCCCGGTGTAACGGTGGAATGTGTAGATATCGGGAAGAACACCA 180
||||||||||||||||||||||||||||||||||||||||||||||||||||||||||||
Sbjct 646 TAGGGGAGACTGGAATTCCCGGTGTAACGGTGGAATGTGTAGATATCGGGAAGAACACCA 705
Query 181 ATGGCGAAGGCAGGTCTCTGGGCCGTTACTGACGCTGAGGAGCGAAAGCGTGGGGAG 237
|||||||||||||||||||||||||| ||||||||||||||||||||||||||||||
Sbjct 706 ATGGCGAAGGCAGGTCTCTGGGCCGTCACTGACGCTGAGGAGCGAAAGCGTGGGGAG 762
>NR_118589.1 Bifidobacterium stercoris JCM 15918 strain Eg1 16S ribosomal
RNA, partial sequence
Length=1523
Score = 433 bits (234), Expect = 3e-121
Identities = 236/237 (99%), Gaps = 0/237 (0%)
Strand=Plus/Plus
Query 1 GTGCAAGCGTTATCCGGAATTATTGGGCGTAAAGGGCTCGTAGGCGGTTCGTCGCGTCCG 60
||||||||||||||||||||||||||||||||||||||||||||||||||||||||||||
Sbjct 520 GTGCAAGCGTTATCCGGAATTATTGGGCGTAAAGGGCTCGTAGGCGGTTCGTCGCGTCCG 579
Query 61 GTGTGAAAGTCCATCGCTTAACGGTGGATCCGCGCCGGGTACGGGCGGGCTTGAGTGCGG 120
||||||||||||||||||||||||||||||||||||||||||||||||||||||||||||
Sbjct 580 GTGTGAAAGTCCATCGCTTAACGGTGGATCCGCGCCGGGTACGGGCGGGCTTGAGTGCGG 639
Query 121 TAGGGGAGACTGGAATTCCCGGTGTAACGGTGGAATGTGTAGATATCGGGAAGAACACCA 180
||||||||||||||||||||||||||||||||||||||||||||||||||||||||||||
Sbjct 640 TAGGGGAGACTGGAATTCCCGGTGTAACGGTGGAATGTGTAGATATCGGGAAGAACACCA 699
Query 181 ATGGCGAAGGCAGGTCTCTGGGCCGTTACTGACGCTGAGGAGCGAAAGCGTGGGGAG 237
|||||||||||||||||||||||||| ||||||||||||||||||||||||||||||
Sbjct 700 ATGGCGAAGGCAGGTCTCTGGGCCGTCACTGACGCTGAGGAGCGAAAGCGTGGGGAG 756
>NR_133982.1 Bifidobacterium faecale strain CU3-7 16S ribosomal RNA, partial
sequence
Length=1449
Score = 433 bits (234), Expect = 3e-121
Identities = 236/237 (99%), Gaps = 0/237 (0%)
Strand=Plus/Plus
Query 1 GTGCAAGCGTTATCCGGAATTATTGGGCGTAAAGGGCTCGTAGGCGGTTCGTCGCGTCCG 60
||||||||||||||||||||||||||||||||||||||||||||||||||||||||||||
Sbjct 496 GTGCAAGCGTTATCCGGAATTATTGGGCGTAAAGGGCTCGTAGGCGGTTCGTCGCGTCCG 555
Query 61 GTGTGAAAGTCCATCGCTTAACGGTGGATCCGCGCCGGGTACGGGCGGGCTTGAGTGCGG 120
||||||||||||||||||||||||||||||||||||||||||||||||||||||||||||
Sbjct 556 GTGTGAAAGTCCATCGCTTAACGGTGGATCCGCGCCGGGTACGGGCGGGCTTGAGTGCGG 615
Query 121 TAGGGGAGACTGGAATTCCCGGTGTAACGGTGGAATGTGTAGATATCGGGAAGAACACCA 180
||||||||||||||||||||||||||||||||||||||||||||||||||||||||||||
Sbjct 616 TAGGGGAGACTGGAATTCCCGGTGTAACGGTGGAATGTGTAGATATCGGGAAGAACACCA 675
Query 181 ATGGCGAAGGCAGGTCTCTGGGCCGTTACTGACGCTGAGGAGCGAAAGCGTGGGGAG 237
|||||||||||||||||||||||||| ||||||||||||||||||||||||||||||
Sbjct 676 ATGGCGAAGGCAGGTCTCTGGGCCGTCACTGACGCTGAGGAGCGAAAGCGTGGGGAG 732
>NR_043442.2 Bifidobacterium pseudolongum strain PNC-2-9G 16S ribosomal RNA,
partial sequence
Length=1525
Score = 433 bits (234), Expect = 3e-121
Identities = 236/237 (99%), Gaps = 0/237 (0%)
Strand=Plus/Plus
Query 1 GTGCAAGCGTTATCCGGAATTATTGGGCGTAAAGGGCTCGTAGGCGGTTCGTCGCGTCCG 60
|||||||||||||||||| |||||||||||||||||||||||||||||||||||||||||
Sbjct 523 GTGCAAGCGTTATCCGGATTTATTGGGCGTAAAGGGCTCGTAGGCGGTTCGTCGCGTCCG 582
Query 61 GTGTGAAAGTCCATCGCTTAACGGTGGATCCGCGCCGGGTACGGGCGGGCTTGAGTGCGG 120
||||||||||||||||||||||||||||||||||||||||||||||||||||||||||||
Sbjct 583 GTGTGAAAGTCCATCGCTTAACGGTGGATCCGCGCCGGGTACGGGCGGGCTTGAGTGCGG 642
Query 121 TAGGGGAGACTGGAATTCCCGGTGTAACGGTGGAATGTGTAGATATCGGGAAGAACACCA 180
||||||||||||||||||||||||||||||||||||||||||||||||||||||||||||
Sbjct 643 TAGGGGAGACTGGAATTCCCGGTGTAACGGTGGAATGTGTAGATATCGGGAAGAACACCA 702
Query 181 ATGGCGAAGGCAGGTCTCTGGGCCGTTACTGACGCTGAGGAGCGAAAGCGTGGGGAG 237
|||||||||||||||||||||||||||||||||||||||||||||||||||||||||
Sbjct 703 ATGGCGAAGGCAGGTCTCTGGGCCGTTACTGACGCTGAGGAGCGAAAGCGTGGGGAG 759
>NR_043441.2 Bifidobacterium pseudolongum subsp. globosum strain RU 224 16S
ribosomal RNA, partial sequence
Length=1526
Score = 433 bits (234), Expect = 3e-121
Identities = 236/237 (99%), Gaps = 0/237 (0%)
Strand=Plus/Plus
Query 1 GTGCAAGCGTTATCCGGAATTATTGGGCGTAAAGGGCTCGTAGGCGGTTCGTCGCGTCCG 60
|||||||||||||||||| |||||||||||||||||||||||||||||||||||||||||
Sbjct 524 GTGCAAGCGTTATCCGGATTTATTGGGCGTAAAGGGCTCGTAGGCGGTTCGTCGCGTCCG 583
Query 61 GTGTGAAAGTCCATCGCTTAACGGTGGATCCGCGCCGGGTACGGGCGGGCTTGAGTGCGG 120
||||||||||||||||||||||||||||||||||||||||||||||||||||||||||||
Sbjct 584 GTGTGAAAGTCCATCGCTTAACGGTGGATCCGCGCCGGGTACGGGCGGGCTTGAGTGCGG 643
Query 121 TAGGGGAGACTGGAATTCCCGGTGTAACGGTGGAATGTGTAGATATCGGGAAGAACACCA 180
||||||||||||||||||||||||||||||||||||||||||||||||||||||||||||
Sbjct 644 TAGGGGAGACTGGAATTCCCGGTGTAACGGTGGAATGTGTAGATATCGGGAAGAACACCA 703
Query 181 ATGGCGAAGGCAGGTCTCTGGGCCGTTACTGACGCTGAGGAGCGAAAGCGTGGGGAG 237
|||||||||||||||||||||||||||||||||||||||||||||||||||||||||
Sbjct 704 ATGGCGAAGGCAGGTCTCTGGGCCGTTACTGACGCTGAGGAGCGAAAGCGTGGGGAG 760
>NR_116746.1 Bifidobacterium stercoris JCM 15918 strain Eg1 16S ribosomal
RNA, partial sequence
Length=1416
Score = 433 bits (234), Expect = 3e-121
Identities = 236/237 (99%), Gaps = 0/237 (0%)
Strand=Plus/Plus
Query 1 GTGCAAGCGTTATCCGGAATTATTGGGCGTAAAGGGCTCGTAGGCGGTTCGTCGCGTCCG 60
||||||||||||||||||||||||||||||||||||||||||||||||||||||||||||
Sbjct 494 GTGCAAGCGTTATCCGGAATTATTGGGCGTAAAGGGCTCGTAGGCGGTTCGTCGCGTCCG 553
Query 61 GTGTGAAAGTCCATCGCTTAACGGTGGATCCGCGCCGGGTACGGGCGGGCTTGAGTGCGG 120
||||||||||||||||||||||||||||||||||||||||||||||||||||||||||||
Sbjct 554 GTGTGAAAGTCCATCGCTTAACGGTGGATCCGCGCCGGGTACGGGCGGGCTTGAGTGCGG 613
Query 121 TAGGGGAGACTGGAATTCCCGGTGTAACGGTGGAATGTGTAGATATCGGGAAGAACACCA 180
||||||||||||||||||||||||||||||||||||||||||||||||||||||||||||
Sbjct 614 TAGGGGAGACTGGAATTCCCGGTGTAACGGTGGAATGTGTAGATATCGGGAAGAACACCA 673
Query 181 ATGGCGAAGGCAGGTCTCTGGGCCGTTACTGACGCTGAGGAGCGAAAGCGTGGGGAG 237
|||||||||||||||||||||||||| ||||||||||||||||||||||||||||||
Sbjct 674 ATGGCGAAGGCAGGTCTCTGGGCCGTCACTGACGCTGAGGAGCGAAAGCGTGGGGAG 730
>NR_113173.1 Bifidobacterium saguini DSM 23967 strain AFB23-1 16S ribosomal
RNA, partial sequence
Length=1433
Score = 431 bits (233), Expect = 9e-121
Identities = 234/235 (99%), Gaps = 0/235 (0%)
Strand=Plus/Plus
Query 3 GCAAGCGTTATCCGGAATTATTGGGCGTAAAGGGCTCGTAGGCGGTTCGTCGCGTCCGGT 62
||||||||||||||||||||||||||||||||||||||||||||||||||||||||||||
Sbjct 508 GCAAGCGTTATCCGGAATTATTGGGCGTAAAGGGCTCGTAGGCGGTTCGTCGCGTCCGGT 567
Query 63 GTGAAAGTCCATCGCTTAACGGTGGATCCGCGCCGGGTACGGGCGGGCTTGAGTGCGGTA 122
|||||||||||||||||||||| |||||||||||||||||||||||||||||||||||||
Sbjct 568 GTGAAAGTCCATCGCTTAACGGYGGATCCGCGCCGGGTACGGGCGGGCTTGAGTGCGGTA 627
Query 123 GGGGAGACTGGAATTCCCGGTGTAACGGTGGAATGTGTAGATATCGGGAAGAACACCAAT 182
||||||||||||||||||||||||||||||||||||||||||||||||||||||||||||
Sbjct 628 GGGGAGACTGGAATTCCCGGTGTAACGGTGGAATGTGTAGATATCGGGAAGAACACCAAT 687
Query 183 GGCGAAGGCAGGTCTCTGGGCCGTTACTGACGCTGAGGAGCGAAAGCGTGGGGAG 237
|||||||||||||||||||||||||||||||||||||||||||||||||||||||
Sbjct 688 GGCGAAGGCAGGTCTCTGGGCCGTTACTGACGCTGAGGAGCGAAAGCGTGGGGAG 742
>NR_037118.1 Bifidobacterium gallicum strain P6 16S ribosomal RNA, partial
sequence
Length=1530
Score = 427 bits (231), Expect = 1e-119
Identities = 235/237 (99%), Gaps = 0/237 (0%)
Strand=Plus/Plus
Query 1 GTGCAAGCGTTATCCGGAATTATTGGGCGTAAAGGGCTCGTAGGCGGTTCGTCGCGTCCG 60
||||||||||||||||||||||||||||||||||||||||||||||||||||||||||||
Sbjct 522 GTGCAAGCGTTATCCGGAATTATTGGGCGTAAAGGGCTCGTAGGCGGTTCGTCGCGTCCG 581
Query 61 GTGTGAAAGTCCATCGCTTAACGGTGGATCCGCGCCGGGTACGGGCGGGCTTGAGTGCGG 120
|||||||||||||||||||||||||||||| |||||||||||||||||||| ||||||||
Sbjct 582 GTGTGAAAGTCCATCGCTTAACGGTGGATCTGCGCCGGGTACGGGCGGGCTGGAGTGCGG 641
Query 121 TAGGGGAGACTGGAATTCCCGGTGTAACGGTGGAATGTGTAGATATCGGGAAGAACACCA 180
||||||||||||||||||||||||||||||||||||||||||||||||||||||||||||
Sbjct 642 TAGGGGAGACTGGAATTCCCGGTGTAACGGTGGAATGTGTAGATATCGGGAAGAACACCA 701
Query 181 ATGGCGAAGGCAGGTCTCTGGGCCGTTACTGACGCTGAGGAGCGAAAGCGTGGGGAG 237
|||||||||||||||||||||||||||||||||||||||||||||||||||||||||
Sbjct 702 ATGGCGAAGGCAGGTCTCTGGGCCGTTACTGACGCTGAGGAGCGAAAGCGTGGGGAG 758
>NR_036857.1 Bifidobacterium ruminantium strain Ru 687 16S ribosomal RNA,
partial sequence
Length=1437
Score = 427 bits (231), Expect = 1e-119
Identities = 235/237 (99%), Gaps = 0/237 (0%)
Strand=Plus/Plus
Query 1 GTGCAAGCGTTATCCGGAATTATTGGGCGTAAAGGGCTCGTAGGCGGTTCGTCGCGTCCG 60
||||||||||||||||||||||||||||||||||||||||||||||||||||||||||||
Sbjct 433 GTGCAAGCGTTATCCGGAATTATTGGGCGTAAAGGGCTCGTAGGCGGTTCGTCGCGTCCG 492
Query 61 GTGTGAAAGTCCATCGCTTAACGGTGGATCCGCGCCGGGTACGGGCGGGCTTGAGTGCGG 120
|||||||||||||||||||||||||||||| |||||||||||||||||||||||||||||
Sbjct 493 GTGTGAAAGTCCATCGCTTAACGGTGGATCAGCGCCGGGTACGGGCGGGCTTGAGTGCGG 552
Query 121 TAGGGGAGACTGGAATTCCCGGTGTAACGGTGGAATGTGTAGATATCGGGAAGAACACCA 180
||||||||||||||||||||||||||||||||||||||||||||||||||||||||||||
Sbjct 553 TAGGGGAGACTGGAATTCCCGGTGTAACGGTGGAATGTGTAGATATCGGGAAGAACACCA 612
Query 181 ATGGCGAAGGCAGGTCTCTGGGCCGTTACTGACGCTGAGGAGCGAAAGCGTGGGGAG 237
|||||||||||||||||||||||||| ||||||||||||||||||||||||||||||
Sbjct 613 ATGGCGAAGGCAGGTCTCTGGGCCGTCACTGACGCTGAGGAGCGAAAGCGTGGGGAG 669
>NR_159261.1 Bifidobacterium callitrichidarum strain TRI 5 16S ribosomal RNA,
partial sequence
Length=1374
Score = 427 bits (231), Expect = 1e-119
Identities = 235/237 (99%), Gaps = 0/237 (0%)
Strand=Plus/Plus
Query 1 GTGCAAGCGTTATCCGGAATTATTGGGCGTAAAGGGCTCGTAGGCGGTTCGTCGCGTCCG 60
||||||||||||||||||||||||||||||||||||||||||||||||||||||||||||
Sbjct 444 GTGCAAGCGTTATCCGGAATTATTGGGCGTAAAGGGCTCGTAGGCGGTTCGTCGCGTCCG 503
Query 61 GTGTGAAAGTCCATCGCTTAACGGTGGATCCGCGCCGGGTACGGGCGGGCTTGAGTGCGG 120
|||||||||||||||||||||||||||||| |||||||||||||||||||| ||||||||
Sbjct 504 GTGTGAAAGTCCATCGCTTAACGGTGGATCTGCGCCGGGTACGGGCGGGCTGGAGTGCGG 563
Query 121 TAGGGGAGACTGGAATTCCCGGTGTAACGGTGGAATGTGTAGATATCGGGAAGAACACCA 180
||||||||||||||||||||||||||||||||||||||||||||||||||||||||||||
Sbjct 564 TAGGGGAGACTGGAATTCCCGGTGTAACGGTGGAATGTGTAGATATCGGGAAGAACACCA 623
Query 181 ATGGCGAAGGCAGGTCTCTGGGCCGTTACTGACGCTGAGGAGCGAAAGCGTGGGGAG 237
|||||||||||||||||||||||||||||||||||||||||||||||||||||||||
Sbjct 624 ATGGCGAAGGCAGGTCTCTGGGCCGTTACTGACGCTGAGGAGCGAAAGCGTGGGGAG 680
>NR_041875.1 Bifidobacterium catenulatum strain DSM 16992 16S ribosomal RNA,
partial sequence
Length=1445
Score = 427 bits (231), Expect = 1e-119
Identities = 235/237 (99%), Gaps = 0/237 (0%)
Strand=Plus/Plus
Query 1 GTGCAAGCGTTATCCGGAATTATTGGGCGTAAAGGGCTCGTAGGCGGTTCGTCGCGTCCG 60
||||||||||||||||||||||||||||||||||||||||||||||||||||||||||||
Sbjct 493 GTGCAAGCGTTATCCGGAATTATTGGGCGTAAAGGGCTCGTAGGCGGTTCGTCGCGTCCG 552
Query 61 GTGTGAAAGTCCATCGCTTAACGGTGGATCCGCGCCGGGTACGGGCGGGCTTGAGTGCGG 120
|||||||||||||||||||||||||||||| |||||||||||||||||||| ||||||||
Sbjct 553 GTGTGAAAGTCCATCGCTTAACGGTGGATCTGCGCCGGGTACGGGCGGGCTGGAGTGCGG 612
Query 121 TAGGGGAGACTGGAATTCCCGGTGTAACGGTGGAATGTGTAGATATCGGGAAGAACACCA 180
||||||||||||||||||||||||||||||||||||||||||||||||||||||||||||
Sbjct 613 TAGGGGAGACTGGAATTCCCGGTGTAACGGTGGAATGTGTAGATATCGGGAAGAACACCA 672
Query 181 ATGGCGAAGGCAGGTCTCTGGGCCGTTACTGACGCTGAGGAGCGAAAGCGTGGGGAG 237
|||||||||||||||||||||||||||||||||||||||||||||||||||||||||
Sbjct 673 ATGGCGAAGGCAGGTCTCTGGGCCGTTACTGACGCTGAGGAGCGAAAGCGTGGGGAG 729
>NR_037117.1 Bifidobacterium pseudocatenulatum strain B1279 16S ribosomal
RNA, partial sequence
Length=1513
Score = 427 bits (231), Expect = 1e-119
Identities = 235/237 (99%), Gaps = 0/237 (0%)
Strand=Plus/Plus
Query 1 GTGCAAGCGTTATCCGGAATTATTGGGCGTAAAGGGCTCGTAGGCGGTTCGTCGCGTCCG 60
||||||||||||||||||||||||||||||||||||||||||||||||||||||||||||
Sbjct 514 GTGCAAGCGTTATCCGGAATTATTGGGCGTAAAGGGCTCGTAGGCGGTTCGTCGCGTCCG 573
Query 61 GTGTGAAAGTCCATCGCTTAACGGTGGATCCGCGCCGGGTACGGGCGGGCTTGAGTGCGG 120
|||||||||||||||||||||||||||||| |||||||||||||||||||| ||||||||
Sbjct 574 GTGTGAAAGTCCATCGCTTAACGGTGGATCTGCGCCGGGTACGGGCGGGCTGGAGTGCGG 633
Query 121 TAGGGGAGACTGGAATTCCCGGTGTAACGGTGGAATGTGTAGATATCGGGAAGAACACCA 180
||||||||||||||||||||||||||||||||||||||||||||||||||||||||||||
Sbjct 634 TAGGGGAGACTGGAATTCCCGGTGTAACGGTGGAATGTGTAGATATCGGGAAGAACACCA 693
Query 181 ATGGCGAAGGCAGGTCTCTGGGCCGTTACTGACGCTGAGGAGCGAAAGCGTGGGGAG 237
|||||||||||||||||||||||||||||||||||||||||||||||||||||||||
Sbjct 694 ATGGCGAAGGCAGGTCTCTGGGCCGTTACTGACGCTGAGGAGCGAAAGCGTGGGGAG 750
>NR_112779.1 Bifidobacterium kashiwanohense JCM 15439 = DSM 21854 strain HM2-2
16S ribosomal RNA, partial sequence
Length=1515
Score = 427 bits (231), Expect = 1e-119
Identities = 235/237 (99%), Gaps = 0/237 (0%)
Strand=Plus/Plus
Query 1 GTGCAAGCGTTATCCGGAATTATTGGGCGTAAAGGGCTCGTAGGCGGTTCGTCGCGTCCG 60
||||||||||||||||||||||||||||||||||||||||||||||||||||||||||||
Sbjct 514 GTGCAAGCGTTATCCGGAATTATTGGGCGTAAAGGGCTCGTAGGCGGTTCGTCGCGTCCG 573
Query 61 GTGTGAAAGTCCATCGCTTAACGGTGGATCCGCGCCGGGTACGGGCGGGCTTGAGTGCGG 120
|||||||||||||||||||||||||||||| |||||||||||||||||||| ||||||||
Sbjct 574 GTGTGAAAGTCCATCGCTTAACGGTGGATCTGCGCCGGGTACGGGCGGGCTGGAGTGCGG 633
Query 121 TAGGGGAGACTGGAATTCCCGGTGTAACGGTGGAATGTGTAGATATCGGGAAGAACACCA 180
||||||||||||||||||||||||||||||||||||||||||||||||||||||||||||
Sbjct 634 TAGGGGAGACTGGAATTCCCGGTGTAACGGTGGAATGTGTAGATATCGGGAAGAACACCA 693
Query 181 ATGGCGAAGGCAGGTCTCTGGGCCGTTACTGACGCTGAGGAGCGAAAGCGTGGGGAG 237
|||||||||||||||||||||||||||||||||||||||||||||||||||||||||
Sbjct 694 ATGGCGAAGGCAGGTCTCTGGGCCGTTACTGACGCTGAGGAGCGAAAGCGTGGGGAG 750

## Sheet: Genus_Gardnerella_20
Database: 16S ribosomal RNA (Bacteria and Archaea)
21,632 sequences; 31,458,767 total letters
Query= Genus_Gardnerella_20|19a083c0a0e9c5eede84da9ae3de327a
Length=237
Score E Max
Sequences producing significant alignments: (Bits) Value Ident
NR_118377.1 Gardnerella vaginalis ATCC 14018 = JCM 11026 16S r... 438 6e-123 100%
NR_044694.2 Gardnerella vaginalis strain 594 16S ribosomal RNA... 435 7e-122 100%
ALIGNMENTS
>NR_118377.1 Gardnerella vaginalis ATCC 14018 = JCM 11026 16S ribosomal RNA,
partial sequence
Length=1364
Score = 438 bits (237), Expect = 6e-123
Identities = 237/237 (100%), Gaps = 0/237 (0%)
Strand=Plus/Plus
Query 1 GCGCAAGCGTTATCCGGAATTATTGGGCGTAAAGAGCTTGTAGGCGGTTCGTCGCGTCTG 60
||||||||||||||||||||||||||||||||||||||||||||||||||||||||||||
Sbjct 462 GCGCAAGCGTTATCCGGAATTATTGGGCGTAAAGAGCTTGTAGGCGGTTCGTCGCGTCTG 521
Query 61 GTGTGAAAGCCCATCGCTTAACGGTGGGTTTGCGCCGGGTACGGGCGGGCTAGAGTGCAG 120
||||||||||||||||||||||||||||||||||||||||||||||||||||||||||||
Sbjct 522 GTGTGAAAGCCCATCGCTTAACGGTGGGTTTGCGCCGGGTACGGGCGGGCTAGAGTGCAG 581
Query 121 TAGGGGAGACTGGAATTCTCGGTGTAACGGTGGAATGTGTAGATATCGGGAAGAACACCA 180
||||||||||||||||||||||||||||||||||||||||||||||||||||||||||||
Sbjct 582 TAGGGGAGACTGGAATTCTCGGTGTAACGGTGGAATGTGTAGATATCGGGAAGAACACCA 641
Query 181 ATGGCGAAGGCAGGTCTCTGGGCTGTTACTGACGCTGAGAAGCGAAAGCGTGGGGAG 237
|||||||||||||||||||||||||||||||||||||||||||||||||||||||||
Sbjct 642 ATGGCGAAGGCAGGTCTCTGGGCTGTTACTGACGCTGAGAAGCGAAAGCGTGGGGAG 698
>NR_044694.2 Gardnerella vaginalis strain 594 16S ribosomal RNA, partial sequence
Length=1475
Score = 435 bits (235), Expect = 7e-122
Identities = 236/237 (99%), Gaps = 0/237 (0%)
Strand=Plus/Plus
Query 1 GCGCAAGCGTTATCCGGAATTATTGGGCGTAAAGAGCTTGTAGGCGGTTCGTCGCGTCTG 60
||||||||||||||||||||||||||||||||||||||||||||||||||||||||||||
Sbjct 524 GCGCAAGCGTTATCCGGAATTATTGGGCGTAAAGAGCTTGTAGGCGGTTCGTCGCGTCTG 583
Query 61 GTGTGAAAGCCCATCGCTTAACGGTGGGTTTGCGCCGGGTACGGGCGGGCTAGAGTGCAG 120
|||||||||||||||||||||||||||| |||||||||||||||||||||||||||||||
Sbjct 584 GTGTGAAAGCCCATCGCTTAACGGTGGGNTTGCGCCGGGTACGGGCGGGCTAGAGTGCAG 643
Query 121 TAGGGGAGACTGGAATTCTCGGTGTAACGGTGGAATGTGTAGATATCGGGAAGAACACCA 180
||||||||||||||||||||||||||||||||||||||||||||||||||||||||||||
Sbjct 644 TAGGGGAGACTGGAATTCTCGGTGTAACGGTGGAATGTGTAGATATCGGGAAGAACACCA 703
Query 181 ATGGCGAAGGCAGGTCTCTGGGCTGTTACTGACGCTGAGAAGCGAAAGCGTGGGGAG 237
|||||||||||||||||||||||||||||||||||||||||||||||||||||||||
Sbjct 704 ATGGCGAAGGCAGGTCTCTGGGCTGTTACTGACGCTGAGAAGCGAAAGCGTGGGGAG 760

## Sheet: Genus_Gardnerella_40
Database: 16S ribosomal RNA (Bacteria and Archaea)
21,632 sequences; 31,458,767 total letters
Query= Genus_Gardnerella_40|0c4699649b1bca69c2ecf90d80b3d714
Length=237
Score E Max
Sequences producing significant alignments: (Bits) Value Ident
NR_118377.1 Gardnerella vaginalis ATCC 14018 = JCM 11026 16S r... 427 1e-119 99%
ALIGNMENTS
>NR_118377.1 Gardnerella vaginalis ATCC 14018 = JCM 11026 16S ribosomal RNA,
partial sequence
Length=1364
Score = 427 bits (231), Expect = 1e-119
Identities = 235/237 (99%), Gaps = 0/237 (0%)
Strand=Plus/Plus
Query 1 GCGCAAGCGTTATCCGGAATTATTGGGCGTAAAGAGCTTGTAGGCGGTTCGTCGCGTCTG 60
||||||||||||||||||||||||||||||||||||||||||||||||||||||||||||
Sbjct 462 GCGCAAGCGTTATCCGGAATTATTGGGCGTAAAGAGCTTGTAGGCGGTTCGTCGCGTCTG 521
Query 61 GTGTGAAAGCCCATCGCTTAACGGTGGGTCTGCGCCGGGTACGGGCGGGCTAGAGTGCAG 120
||||||||||||||||||||||||||||| ||||||||||||||||||||||||||||||
Sbjct 522 GTGTGAAAGCCCATCGCTTAACGGTGGGTTTGCGCCGGGTACGGGCGGGCTAGAGTGCAG 581
Query 121 TAGGGGAGACTGGAATTCCCGGTGTAACGGTGGAATGTGTAGATATCGGGAAGAACACCA 180
|||||||||||||||||| |||||||||||||||||||||||||||||||||||||||||
Sbjct 582 TAGGGGAGACTGGAATTCTCGGTGTAACGGTGGAATGTGTAGATATCGGGAAGAACACCA 641
Query 181 ATGGCGAAGGCAGGTCTCTGGGCTGTTACTGACGCTGAGAAGCGAAAGCGTGGGGAG 237
|||||||||||||||||||||||||||||||||||||||||||||||||||||||||
Sbjct 642 ATGGCGAAGGCAGGTCTCTGGGCTGTTACTGACGCTGAGAAGCGAAAGCGTGGGGAG 698

## Sheet: Genus_Lactobacillus_139
Database: 16S ribosomal RNA (Bacteria and Archaea)
21,632 sequences; 31,458,767 total letters
Query= Genus_Lactobacillus_139|dbb3a9c3f8c94e2d5e68abf292c02dba
Length=237
Score E Max
Sequences producing significant alignments: (Bits) Value Ident
NR_036982.1 Lactobacillus iners strain DSM 13335 16S ribosomal... 438 6e-123 100%
ALIGNMENTS
>NR_036982.1 Lactobacillus iners strain DSM 13335 16S ribosomal RNA gene,
partial sequence
Length=1539
Score = 438 bits (237), Expect = 6e-123
Identities = 237/237 (100%), Gaps = 0/237 (0%)
Strand=Plus/Plus
Query 1 TGGCAAGCGTTGTCCGGATTTATTGGGCGTAAAGCGAGTGCAGGCGGCTCGATAAGTCTG 60
||||||||||||||||||||||||||||||||||||||||||||||||||||||||||||
Sbjct 552 TGGCAAGCGTTGTCCGGATTTATTGGGCGTAAAGCGAGTGCAGGCGGCTCGATAAGTCTG 611
Query 61 ATGTGAAAGCCTTCGGCTCAACCGGAGAATTGCATCAGAAACTGTCGAGCTTGAGTACAG 120
||||||||||||||||||||||||||||||||||||||||||||||||||||||||||||
Sbjct 612 ATGTGAAAGCCTTCGGCTCAACCGGAGAATTGCATCAGAAACTGTCGAGCTTGAGTACAG 671
Query 121 AAGAGGAGAGTGGAACTCCATGTGTAGCGGTGAAATGCGTAGATATATGGAAGAACACCG 180
||||||||||||||||||||||||||||||||||||||||||||||||||||||||||||
Sbjct 672 AAGAGGAGAGTGGAACTCCATGTGTAGCGGTGAAATGCGTAGATATATGGAAGAACACCG 731
Query 181 GTGGCGAAGGCGGCTCTCTGGTCTGTTACTGACGCTGAGGCTCGAAAGCATGGGTAG 237
|||||||||||||||||||||||||||||||||||||||||||||||||||||||||
Sbjct 732 GTGGCGAAGGCGGCTCTCTGGTCTGTTACTGACGCTGAGGCTCGAAAGCATGGGTAG 788

## Sheet:  Genus_Lactobacillus_268
Database: 16S ribosomal RNA (Bacteria and Archaea)
21,632 sequences; 31,458,767 total letters
Query= Genus_Lactobacillus_268|19e28f1d710bf21e4204982e643fcca2
Length=237
Score E Max
Sequences producing significant alignments: (Bits) Value Ident
NR_026509.1 Lactobacillus fornicalis strain TV1018 16S ribosom... 438 6e-123 100%
NR_117072.1 Lactobacillus jensenii strain Gasser 62G 16S ribos... 438 6e-123 100%
NR_025087.1 Lactobacillus jensenii strain ATCC 25258 16S ribos... 438 6e-123 100%
NR_125811.1 Lactobacillus psittaci 16S ribosomal RNA, partial ... 433 3e-121 100%
ALIGNMENTS
>NR_026509.1 Lactobacillus fornicalis strain TV1018 16S ribosomal RNA, partial
sequence
Length=1421
Score = 438 bits (237), Expect = 6e-123
Identities = 237/237 (100%), Gaps = 0/237 (0%)
Strand=Plus/Plus
Query 1 TGGCAAGCGTTGTCCGGATTTATTGGGCGTAAAGCGAGCGCAGGCGGATTGATAAGTCTG 60
||||||||||||||||||||||||||||||||||||||||||||||||||||||||||||
Sbjct 526 TGGCAAGCGTTGTCCGGATTTATTGGGCGTAAAGCGAGCGCAGGCGGATTGATAAGTCTG 585
Query 61 ATGTGAAAGCCTTCGGCTCAACCGAAGAACTGCATCAGAAACTGTCAATCTTGAGTGCAG 120
||||||||||||||||||||||||||||||||||||||||||||||||||||||||||||
Sbjct 586 ATGTGAAAGCCTTCGGCTCAACCGAAGAACTGCATCAGAAACTGTCAATCTTGAGTGCAG 645
Query 121 AAGAGGAGAGTGGAACTCCATGTGTAGCGGTGGAATGCGTAGATATATGGAAGAACACCA 180
||||||||||||||||||||||||||||||||||||||||||||||||||||||||||||
Sbjct 646 AAGAGGAGAGTGGAACTCCATGTGTAGCGGTGGAATGCGTAGATATATGGAAGAACACCA 705
Query 181 GTGGCGAAGGCGGCTCTCTGGTCTGTAACTGACGCTGAGGCTCGAAAGCATGGGTAG 237
|||||||||||||||||||||||||||||||||||||||||||||||||||||||||
Sbjct 706 GTGGCGAAGGCGGCTCTCTGGTCTGTAACTGACGCTGAGGCTCGAAAGCATGGGTAG 762
>NR_117072.1 Lactobacillus jensenii strain Gasser 62G 16S ribosomal RNA, partial
sequence
Length=1500
Score = 438 bits (237), Expect = 6e-123
Identities = 237/237 (100%), Gaps = 0/237 (0%)
Strand=Plus/Plus
Query 1 TGGCAAGCGTTGTCCGGATTTATTGGGCGTAAAGCGAGCGCAGGCGGATTGATAAGTCTG 60
||||||||||||||||||||||||||||||||||||||||||||||||||||||||||||
Sbjct 508 TGGCAAGCGTTGTCCGGATTTATTGGGCGTAAAGCGAGCGCAGGCGGATTGATAAGTCTG 567
Query 61 ATGTGAAAGCCTTCGGCTCAACCGAAGAACTGCATCAGAAACTGTCAATCTTGAGTGCAG 120
||||||||||||||||||||||||||||||||||||||||||||||||||||||||||||
Sbjct 568 ATGTGAAAGCCTTCGGCTCAACCGAAGAACTGCATCAGAAACTGTCAATCTTGAGTGCAG 627
Query 121 AAGAGGAGAGTGGAACTCCATGTGTAGCGGTGGAATGCGTAGATATATGGAAGAACACCA 180
||||||||||||||||||||||||||||||||||||||||||||||||||||||||||||
Sbjct 628 AAGAGGAGAGTGGAACTCCATGTGTAGCGGTGGAATGCGTAGATATATGGAAGAACACCA 687
Query 181 GTGGCGAAGGCGGCTCTCTGGTCTGTAACTGACGCTGAGGCTCGAAAGCATGGGTAG 237
|||||||||||||||||||||||||||||||||||||||||||||||||||||||||
Sbjct 688 GTGGCGAAGGCGGCTCTCTGGTCTGTAACTGACGCTGAGGCTCGAAAGCATGGGTAG 744
>NR_025087.1 Lactobacillus jensenii strain ATCC 25258 16S ribosomal RNA, partial
sequence
Length=1496
Score = 438 bits (237), Expect = 6e-123
Identities = 237/237 (100%), Gaps = 0/237 (0%)
Strand=Plus/Plus
Query 1 TGGCAAGCGTTGTCCGGATTTATTGGGCGTAAAGCGAGCGCAGGCGGATTGATAAGTCTG 60
||||||||||||||||||||||||||||||||||||||||||||||||||||||||||||
Sbjct 520 TGGCAAGCGTTGTCCGGATTTATTGGGCGTAAAGCGAGCGCAGGCGGATTGATAAGTCTG 579
Query 61 ATGTGAAAGCCTTCGGCTCAACCGAAGAACTGCATCAGAAACTGTCAATCTTGAGTGCAG 120
||||||||||||||||||||||||||||||||||||||||||||||||||||||||||||
Sbjct 580 ATGTGAAAGCCTTCGGCTCAACCGAAGAACTGCATCAGAAACTGTCAATCTTGAGTGCAG 639
Query 121 AAGAGGAGAGTGGAACTCCATGTGTAGCGGTGGAATGCGTAGATATATGGAAGAACACCA 180
||||||||||||||||||||||||||||||||||||||||||||||||||||||||||||
Sbjct 640 AAGAGGAGAGTGGAACTCCATGTGTAGCGGTGGAATGCGTAGATATATGGAAGAACACCA 699
Query 181 GTGGCGAAGGCGGCTCTCTGGTCTGTAACTGACGCTGAGGCTCGAAAGCATGGGTAG 237
|||||||||||||||||||||||||||||||||||||||||||||||||||||||||
Sbjct 700 GTGGCGAAGGCGGCTCTCTGGTCTGTAACTGACGCTGAGGCTCGAAAGCATGGGTAG 756
>NR_125811.1 Lactobacillus psittaci 16S ribosomal RNA, partial sequence
Length=1421
Score = 433 bits (234), Expect = 3e-121
Identities = 236/237 (99%), Gaps = 0/237 (0%)
Strand=Plus/Plus
Query 1 TGGCAAGCGTTGTCCGGATTTATTGGGCGTAAAGCGAGCGCAGGCGGATTGATAAGTCTG 60
||||||||||||||||||||||||||||||||||||||||||||||||||||||||||||
Sbjct 528 TGGCAAGCGTTGTCCGGATTTATTGGGCGTAAAGCGAGCGCAGGCGGATTGATAAGTCTG 587
Query 61 ATGTGAAAGCCTTCGGCTCAACCGAAGAACTGCATCAGAAACTGTCAATCTTGAGTGCAG 120
|||||||||||||||||||||||| |||||||||||||||||||||||||||||||||||
Sbjct 588 ATGTGAAAGCCTTCGGCTCAACCGGAGAACTGCATCAGAAACTGTCAATCTTGAGTGCAG 647
Query 121 AAGAGGAGAGTGGAACTCCATGTGTAGCGGTGGAATGCGTAGATATATGGAAGAACACCA 180
||||||||||||||||||||||||||||||||||||||||||||||||||||||||||||
Sbjct 648 AAGAGGAGAGTGGAACTCCATGTGTAGCGGTGGAATGCGTAGATATATGGAAGAACACCA 707
Query 181 GTGGCGAAGGCGGCTCTCTGGTCTGTAACTGACGCTGAGGCTCGAAAGCATGGGTAG 237
|||||||||||||||||||||||||||||||||||||||||||||||||||||||||
Sbjct 708 GTGGCGAAGGCGGCTCTCTGGTCTGTAACTGACGCTGAGGCTCGAAAGCATGGGTAG 764

## Sheet: Lactobacillus_gasseri_37
Database: 16S ribosomal RNA (Bacteria and Archaea)
21,632 sequences; 31,458,767 total letters
Query= Lactobacillus_gasseri_37|44d9fc4de8898b6c82c69654435a9f0b
Length=237
Score E Max
Sequences producing significant alignments: (Bits) Value Ident
NR_075051.2 Lactobacillus gasseri ATCC 33323 = JCM 1131 16S ri... 438 6e-123 100%
NR_125548.1 Lactobacillus hominis DSM 23910 = CRBIP 24.179 16S... 438 6e-123 100%
NR_117574.1 Lactobacillus johnsonii strain CIP 103620 16S ribo... 438 6e-123 100%
NR_117573.1 Lactobacillus gasseri strain CIP 102991 16S riboso... 438 6e-123 100%
NR_041920.1 Lactobacillus gasseri ATCC 33323 = JCM 1131 16S ri... 438 6e-123 100%
NR_044507.1 Lactobacillus taiwanensis strain BCRC 17755 16S ri... 438 6e-123 100%
NR_156075.1 Lactobacillus colini strain 111144-L1 16S ribosoma... 427 1e-119 99%
NR_025273.1 Lactobacillus johnsonii strain ATCC 33200 16S ribo... 427 1e-119 99%
ALIGNMENTS
>NR_075051.2 Lactobacillus gasseri ATCC 33323 = JCM 1131 16S ribosomal RNA,
complete sequence
Length=1573
Score = 438 bits (237), Expect = 6e-123
Identities = 237/237 (100%), Gaps = 0/237 (0%)
Strand=Plus/Plus
Query 1 TGGCAAGCGTTGTCCGGATTTATTGGGCGTAAAGCGAGTGCAGGCGGTTCAATAAGTCTG 60
||||||||||||||||||||||||||||||||||||||||||||||||||||||||||||
Sbjct 571 TGGCAAGCGTTGTCCGGATTTATTGGGCGTAAAGCGAGTGCAGGCGGTTCAATAAGTCTG 630
Query 61 ATGTGAAAGCCTTCGGCTCAACCGGAGAATTGCATCAGAAACTGTTGAACTTGAGTGCAG 120
||||||||||||||||||||||||||||||||||||||||||||||||||||||||||||
Sbjct 631 ATGTGAAAGCCTTCGGCTCAACCGGAGAATTGCATCAGAAACTGTTGAACTTGAGTGCAG 690
Query 121 AAGAGGAGAGTGGAACTCCATGTGTAGCGGTGGAATGCGTAGATATATGGAAGAACACCA 180
||||||||||||||||||||||||||||||||||||||||||||||||||||||||||||
Sbjct 691 AAGAGGAGAGTGGAACTCCATGTGTAGCGGTGGAATGCGTAGATATATGGAAGAACACCA 750
Query 181 GTGGCGAAGGCGGCTCTCTGGTCTGCAACTGACGCTGAGGCTCGAAAGCATGGGTAG 237
|||||||||||||||||||||||||||||||||||||||||||||||||||||||||
Sbjct 751 GTGGCGAAGGCGGCTCTCTGGTCTGCAACTGACGCTGAGGCTCGAAAGCATGGGTAG 807
>NR_125548.1 Lactobacillus hominis DSM 23910 = CRBIP 24.179 16S ribosomal
RNA, partial sequence
Length=1565
Score = 438 bits (237), Expect = 6e-123
Identities = 237/237 (100%), Gaps = 0/237 (0%)
Strand=Plus/Plus
Query 1 TGGCAAGCGTTGTCCGGATTTATTGGGCGTAAAGCGAGTGCAGGCGGTTCAATAAGTCTG 60
||||||||||||||||||||||||||||||||||||||||||||||||||||||||||||
Sbjct 563 TGGCAAGCGTTGTCCGGATTTATTGGGCGTAAAGCGAGTGCAGGCGGTTCAATAAGTCTG 622
Query 61 ATGTGAAAGCCTTCGGCTCAACCGGAGAATTGCATCAGAAACTGTTGAACTTGAGTGCAG 120
||||||||||||||||||||||||||||||||||||||||||||||||||||||||||||
Sbjct 623 ATGTGAAAGCCTTCGGCTCAACCGGAGAATTGCATCAGAAACTGTTGAACTTGAGTGCAG 682
Query 121 AAGAGGAGAGTGGAACTCCATGTGTAGCGGTGGAATGCGTAGATATATGGAAGAACACCA 180
||||||||||||||||||||||||||||||||||||||||||||||||||||||||||||
Sbjct 683 AAGAGGAGAGTGGAACTCCATGTGTAGCGGTGGAATGCGTAGATATATGGAAGAACACCA 742
Query 181 GTGGCGAAGGCGGCTCTCTGGTCTGCAACTGACGCTGAGGCTCGAAAGCATGGGTAG 237
|||||||||||||||||||||||||||||||||||||||||||||||||||||||||
Sbjct 743 GTGGCGAAGGCGGCTCTCTGGTCTGCAACTGACGCTGAGGCTCGAAAGCATGGGTAG 799
>NR_117574.1 Lactobacillus johnsonii strain CIP 103620 16S ribosomal RNA,
partial sequence
Length=1543
Score = 438 bits (237), Expect = 6e-123
Identities = 237/237 (100%), Gaps = 0/237 (0%)
Strand=Plus/Plus
Query 1 TGGCAAGCGTTGTCCGGATTTATTGGGCGTAAAGCGAGTGCAGGCGGTTCAATAAGTCTG 60
||||||||||||||||||||||||||||||||||||||||||||||||||||||||||||
Sbjct 550 TGGCAAGCGTTGTCCGGATTTATTGGGCGTAAAGCGAGTGCAGGCGGTTCAATAAGTCTG 609
Query 61 ATGTGAAAGCCTTCGGCTCAACCGGAGAATTGCATCAGAAACTGTTGAACTTGAGTGCAG 120
||||||||||||||||||||||||||||||||||||||||||||||||||||||||||||
Sbjct 610 ATGTGAAAGCCTTCGGCTCAACCGGAGAATTGCATCAGAAACTGTTGAACTTGAGTGCAG 669
Query 121 AAGAGGAGAGTGGAACTCCATGTGTAGCGGTGGAATGCGTAGATATATGGAAGAACACCA 180
||||||||||||||||||||||||||||||||||||||||||||||||||||||||||||
Sbjct 670 AAGAGGAGAGTGGAACTCCATGTGTAGCGGTGGAATGCGTAGATATATGGAAGAACACCA 729
Query 181 GTGGCGAAGGCGGCTCTCTGGTCTGCAACTGACGCTGAGGCTCGAAAGCATGGGTAG 237
|||||||||||||||||||||||||||||||||||||||||||||||||||||||||
Sbjct 730 GTGGCGAAGGCGGCTCTCTGGTCTGCAACTGACGCTGAGGCTCGAAAGCATGGGTAG 786
>NR_117573.1 Lactobacillus gasseri strain CIP 102991 16S ribosomal RNA, partial
sequence
Length=1529
Score = 438 bits (237), Expect = 6e-123
Identities = 237/237 (100%), Gaps = 0/237 (0%)
Strand=Plus/Plus
Query 1 TGGCAAGCGTTGTCCGGATTTATTGGGCGTAAAGCGAGTGCAGGCGGTTCAATAAGTCTG 60
||||||||||||||||||||||||||||||||||||||||||||||||||||||||||||
Sbjct 535 TGGCAAGCGTTGTCCGGATTTATTGGGCGTAAAGCGAGTGCAGGCGGTTCAATAAGTCTG 594
Query 61 ATGTGAAAGCCTTCGGCTCAACCGGAGAATTGCATCAGAAACTGTTGAACTTGAGTGCAG 120
||||||||||||||||||||||||||||||||||||||||||||||||||||||||||||
Sbjct 595 ATGTGAAAGCCTTCGGCTCAACCGGAGAATTGCATCAGAAACTGTTGAACTTGAGTGCAG 654
Query 121 AAGAGGAGAGTGGAACTCCATGTGTAGCGGTGGAATGCGTAGATATATGGAAGAACACCA 180
||||||||||||||||||||||||||||||||||||||||||||||||||||||||||||
Sbjct 655 AAGAGGAGAGTGGAACTCCATGTGTAGCGGTGGAATGCGTAGATATATGGAAGAACACCA 714
Query 181 GTGGCGAAGGCGGCTCTCTGGTCTGCAACTGACGCTGAGGCTCGAAAGCATGGGTAG 237
|||||||||||||||||||||||||||||||||||||||||||||||||||||||||
Sbjct 715 GTGGCGAAGGCGGCTCTCTGGTCTGCAACTGACGCTGAGGCTCGAAAGCATGGGTAG 771
>NR_041920.1 Lactobacillus gasseri ATCC 33323 = JCM 1131 16S ribosomal RNA,
partial sequence
Length=1572
Score = 438 bits (237), Expect = 6e-123
Identities = 237/237 (100%), Gaps = 0/237 (0%)
Strand=Plus/Plus
Query 1 TGGCAAGCGTTGTCCGGATTTATTGGGCGTAAAGCGAGTGCAGGCGGTTCAATAAGTCTG 60
||||||||||||||||||||||||||||||||||||||||||||||||||||||||||||
Sbjct 570 TGGCAAGCGTTGTCCGGATTTATTGGGCGTAAAGCGAGTGCAGGCGGTTCAATAAGTCTG 629
Query 61 ATGTGAAAGCCTTCGGCTCAACCGGAGAATTGCATCAGAAACTGTTGAACTTGAGTGCAG 120
||||||||||||||||||||||||||||||||||||||||||||||||||||||||||||
Sbjct 630 ATGTGAAAGCCTTCGGCTCAACCGGAGAATTGCATCAGAAACTGTTGAACTTGAGTGCAG 689
Query 121 AAGAGGAGAGTGGAACTCCATGTGTAGCGGTGGAATGCGTAGATATATGGAAGAACACCA 180
||||||||||||||||||||||||||||||||||||||||||||||||||||||||||||
Sbjct 690 AAGAGGAGAGTGGAACTCCATGTGTAGCGGTGGAATGCGTAGATATATGGAAGAACACCA 749
Query 181 GTGGCGAAGGCGGCTCTCTGGTCTGCAACTGACGCTGAGGCTCGAAAGCATGGGTAG 237
|||||||||||||||||||||||||||||||||||||||||||||||||||||||||
Sbjct 750 GTGGCGAAGGCGGCTCTCTGGTCTGCAACTGACGCTGAGGCTCGAAAGCATGGGTAG 806
>NR_044507.1 Lactobacillus taiwanensis strain BCRC 17755 16S ribosomal RNA,
partial sequence
Length=1526
Score = 438 bits (237), Expect = 6e-123
Identities = 237/237 (100%), Gaps = 0/237 (0%)
Strand=Plus/Plus
Query 1 TGGCAAGCGTTGTCCGGATTTATTGGGCGTAAAGCGAGTGCAGGCGGTTCAATAAGTCTG 60
||||||||||||||||||||||||||||||||||||||||||||||||||||||||||||
Sbjct 553 TGGCAAGCGTTGTCCGGATTTATTGGGCGTAAAGCGAGTGCAGGCGGTTCAATAAGTCTG 612
Query 61 ATGTGAAAGCCTTCGGCTCAACCGGAGAATTGCATCAGAAACTGTTGAACTTGAGTGCAG 120
||||||||||||||||||||||||||||||||||||||||||||||||||||||||||||
Sbjct 613 ATGTGAAAGCCTTCGGCTCAACCGGAGAATTGCATCAGAAACTGTTGAACTTGAGTGCAG 672
Query 121 AAGAGGAGAGTGGAACTCCATGTGTAGCGGTGGAATGCGTAGATATATGGAAGAACACCA 180
||||||||||||||||||||||||||||||||||||||||||||||||||||||||||||
Sbjct 673 AAGAGGAGAGTGGAACTCCATGTGTAGCGGTGGAATGCGTAGATATATGGAAGAACACCA 732
Query 181 GTGGCGAAGGCGGCTCTCTGGTCTGCAACTGACGCTGAGGCTCGAAAGCATGGGTAG 237
|||||||||||||||||||||||||||||||||||||||||||||||||||||||||
Sbjct 733 GTGGCGAAGGCGGCTCTCTGGTCTGCAACTGACGCTGAGGCTCGAAAGCATGGGTAG 789
>NR_156075.1 Lactobacillus colini strain 111144-L1 16S ribosomal RNA, partial
sequence
Length=1566
Score = 427 bits (231), Expect = 1e-119
Identities = 235/237 (99%), Gaps = 0/237 (0%)
Strand=Plus/Plus
Query 1 TGGCAAGCGTTGTCCGGATTTATTGGGCGTAAAGCGAGTGCAGGCGGTTCAATAAGTCTG 60
||||||||||||||||||||||||||||||||||||||||||||||||||||||||||||
Sbjct 565 TGGCAAGCGTTGTCCGGATTTATTGGGCGTAAAGCGAGTGCAGGCGGTTCAATAAGTCTG 624
Query 61 ATGTGAAAGCCTTCGGCTCAACCGGAGAATTGCATCAGAAACTGTTGAACTTGAGTGCAG 120
||||||||||||||||||||||||||||||||||||||||||||| ||||||||||||||
Sbjct 625 ATGTGAAAGCCTTCGGCTCAACCGGAGAATTGCATCAGAAACTGTAGAACTTGAGTGCAG 684
Query 121 AAGAGGAGAGTGGAACTCCATGTGTAGCGGTGGAATGCGTAGATATATGGAAGAACACCA 180
||||||||||||||||||||||||||||||||||||||||||||||||||||||||||||
Sbjct 685 AAGAGGAGAGTGGAACTCCATGTGTAGCGGTGGAATGCGTAGATATATGGAAGAACACCA 744
Query 181 GTGGCGAAGGCGGCTCTCTGGTCTGCAACTGACGCTGAGGCTCGAAAGCATGGGTAG 237
||||||||||||||||||||||||| |||||||||||||||||||||||||||||||
Sbjct 745 GTGGCGAAGGCGGCTCTCTGGTCTGTAACTGACGCTGAGGCTCGAAAGCATGGGTAG 801
>NR_025273.1 Lactobacillus johnsonii strain ATCC 33200 16S ribosomal RNA,
partial sequence
Length=1487
Score = 427 bits (231), Expect = 1e-119
Identities = 235/237 (99%), Gaps = 0/237 (0%)
Strand=Plus/Plus
Query 1 TGGCAAGCGTTGTCCGGATTTATTGGGCGTAAAGCGAGTGCAGGCGGTTCAATAAGTCTG 60
||||||||||||||||||||||||||||||||||||||||||||||||||||||||||||
Sbjct 534 TGGCAAGCGTTGTCCGGATTTATTGGGCGTAAAGCGAGTGCAGGCGGTTCAATAAGTCTG 593
Query 61 ATGTGAAAGCCTTCGGCTCAACCGGAGAATTGCATCAGAAACTGTTGAACTTGAGTGCAG 120
|||||||| ||||||||||||||||||||||||||||||||||||||||||||||||||
Sbjct 594 ATGTGAAACGCTTCGGCTCAACCGGAGAATTGCATCAGAAACTGTTGAACTTGAGTGCAG 653
Query 121 AAGAGGAGAGTGGAACTCCATGTGTAGCGGTGGAATGCGTAGATATATGGAAGAACACCA 180
||||||||||||||||||||||||||||||||||||||||||||||||||||||||||||
Sbjct 654 AAGAGGAGAGTGGAACTCCATGTGTAGCGGTGGAATGCGTAGATATATGGAAGAACACCA 713
Query 181 GTGGCGAAGGCGGCTCTCTGGTCTGCAACTGACGCTGAGGCTCGAAAGCATGGGTAG 237
|||||||||||||||||||||||||||||||||||||||||||||||||||||||||
Sbjct 714 GTGGCGAAGGCGGCTCTCTGGTCTGCAACTGACGCTGAGGCTCGAAAGCATGGGTAG 770

## Sheet: Genus_Lactobacillus_323
Database: 16S ribosomal RNA (Bacteria and Archaea)
21,632 sequences; 31,458,767 total letters
Query= Genus_Lactobacillus_323|461839ef076a556fe1791e2de0faf2ef
Length=237
Score E Max
Sequences producing significant alignments: (Bits) Value Ident
NR_114722.1 Lactobacillus gallinarum strain ATCC 33199 16S rib... 438 6e-123 100%
NR_119274.1 Lactobacillus crispatus strain DSM 20584 16S ribos... 438 6e-123 100%
NR_042111.1 Lactobacillus gallinarum strain ATCC 33199 16S rib... 438 6e-123 100%
NR_113638.1 Lactobacillus acidophilus strain NBRC 13951 16S ri... 438 6e-123 100%
NR_043182.1 Lactobacillus acidophilus strain BCRC10695 16S rib... 438 6e-123 100%
NR_117063.1 Lactobacillus crispatus strain DSM 20584 16S ribos... 438 6e-123 100%
NR_117062.1 Lactobacillus acidophilus strain VPI 6032 16S ribo... 438 6e-123 100%
NR_117061.1 Lactobacillus gallinarum strain ATCC 33199 16S rib... 438 6e-123 100%
NR_041800.1 Lactobacillus crispatus strain ATCC 33820 16S ribo... 438 6e-123 100%
NR_113261.1 Lactobacillus gallinarum strain JCM 2011 16S ribos... 438 6e-123 100%
NR_117812.1 Lactobacillus acidophilus strain JCM 1132 16S ribo... 438 6e-123 100%
NR_024813.1 Lactobacillus kitasatonis strain JCM 1039 16S ribo... 433 3e-121 100%
NR_042802.1 Lactobacillus ultunensis strain Kx146C1 16S riboso... 427 1e-119 99%
NR_043287.1 Lactobacillus amylovorus DSM 20531 16S ribosomal R... 427 1e-119 99%
NR_025448.1 Lactobacillus hamsteri strain DSM 5661 16S ribosom... 427 1e-119 99%
NR_113719.1 Lactobacillus helveticus strain NBRC 15019 16S rib... 427 1e-119 99%
NR_117068.1 Lactobacillus hamsteri strain JCM 6256 16S ribosom... 427 1e-119 99%
NR_117065.1 Lactobacillus ultunensis strain CCUG 48460 16S rib... 427 1e-119 99%
NR_117064.1 Lactobacillus amylovorus DSM 20531 16S ribosomal R... 427 1e-119 99%
NR_117060.1 Lactobacillus helveticus DSM 20075 = CGMCC 1.1877 ... 427 1e-119 99%
NR_042439.1 Lactobacillus helveticus DSM 20075 = CGMCC 1.1877 ... 427 1e-119 99%
ALIGNMENTS
>NR_114722.1 Lactobacillus gallinarum strain ATCC 33199 16S ribosomal RNA,
partial sequence
Length=1533
Score = 438 bits (237), Expect = 6e-123
Identities = 237/237 (100%), Gaps = 0/237 (0%)
Strand=Plus/Plus
Query 1 TGGCAAGCGTTGTCCGGATTTATTGGGCGTAAAGCGAGCGCAGGCGGAAGAATAAGTCTG 60
||||||||||||||||||||||||||||||||||||||||||||||||||||||||||||
Sbjct 559 TGGCAAGCGTTGTCCGGATTTATTGGGCGTAAAGCGAGCGCAGGCGGAAGAATAAGTCTG 618
Query 61 ATGTGAAAGCCCTCGGCTTAACCGAGGAACTGCATCGGAAACTGTTTTTCTTGAGTGCAG 120
||||||||||||||||||||||||||||||||||||||||||||||||||||||||||||
Sbjct 619 ATGTGAAAGCCCTCGGCTTAACCGAGGAACTGCATCGGAAACTGTTTTTCTTGAGTGCAG 678
Query 121 AAGAGGAGAGTGGAACTCCATGTGTAGCGGTGGAATGCGTAGATATATGGAAGAACACCA 180
||||||||||||||||||||||||||||||||||||||||||||||||||||||||||||
Sbjct 679 AAGAGGAGAGTGGAACTCCATGTGTAGCGGTGGAATGCGTAGATATATGGAAGAACACCA 738
Query 181 GTGGCGAAGGCGGCTCTCTGGTCTGCAACTGACGCTGAGGCTCGAAAGCATGGGTAG 237
|||||||||||||||||||||||||||||||||||||||||||||||||||||||||
Sbjct 739 GTGGCGAAGGCGGCTCTCTGGTCTGCAACTGACGCTGAGGCTCGAAAGCATGGGTAG 795
>NR_119274.1 Lactobacillus crispatus strain DSM 20584 16S ribosomal RNA, partial
sequence
Length=1557
Score = 438 bits (237), Expect = 6e-123
Identities = 237/237 (100%), Gaps = 0/237 (0%)
Strand=Plus/Plus
Query 1 TGGCAAGCGTTGTCCGGATTTATTGGGCGTAAAGCGAGCGCAGGCGGAAGAATAAGTCTG 60
||||||||||||||||||||||||||||||||||||||||||||||||||||||||||||
Sbjct 557 TGGCAAGCGTTGTCCGGATTTATTGGGCGTAAAGCGAGCGCAGGCGGAAGAATAAGTCTG 616
Query 61 ATGTGAAAGCCCTCGGCTTAACCGAGGAACTGCATCGGAAACTGTTTTTCTTGAGTGCAG 120
||||||||||||||||||||||||||||||||||||||||||||||||||||||||||||
Sbjct 617 ATGTGAAAGCCCTCGGCTTAACCGAGGAACTGCATCGGAAACTGTTTTTCTTGAGTGCAG 676
Query 121 AAGAGGAGAGTGGAACTCCATGTGTAGCGGTGGAATGCGTAGATATATGGAAGAACACCA 180
||||||||||||||||||||||||||||||||||||||||||||||||||||||||||||
Sbjct 677 AAGAGGAGAGTGGAACTCCATGTGTAGCGGTGGAATGCGTAGATATATGGAAGAACACCA 736
Query 181 GTGGCGAAGGCGGCTCTCTGGTCTGCAACTGACGCTGAGGCTCGAAAGCATGGGTAG 237
|||||||||||||||||||||||||||||||||||||||||||||||||||||||||
Sbjct 737 GTGGCGAAGGCGGCTCTCTGGTCTGCAACTGACGCTGAGGCTCGAAAGCATGGGTAG 793
>NR_042111.1 Lactobacillus gallinarum strain ATCC 33199 16S ribosomal RNA,
partial sequence
Length=1546
Score = 438 bits (237), Expect = 6e-123
Identities = 237/237 (100%), Gaps = 0/237 (0%)
Strand=Plus/Plus
Query 1 TGGCAAGCGTTGTCCGGATTTATTGGGCGTAAAGCGAGCGCAGGCGGAAGAATAAGTCTG 60
||||||||||||||||||||||||||||||||||||||||||||||||||||||||||||
Sbjct 546 TGGCAAGCGTTGTCCGGATTTATTGGGCGTAAAGCGAGCGCAGGCGGAAGAATAAGTCTG 605
Query 61 ATGTGAAAGCCCTCGGCTTAACCGAGGAACTGCATCGGAAACTGTTTTTCTTGAGTGCAG 120
||||||||||||||||||||||||||||||||||||||||||||||||||||||||||||
Sbjct 606 ATGTGAAAGCCCTCGGCTTAACCGAGGAACTGCATCGGAAACTGTTTTTCTTGAGTGCAG 665
Query 121 AAGAGGAGAGTGGAACTCCATGTGTAGCGGTGGAATGCGTAGATATATGGAAGAACACCA 180
||||||||||||||||||||||||||||||||||||||||||||||||||||||||||||
Sbjct 666 AAGAGGAGAGTGGAACTCCATGTGTAGCGGTGGAATGCGTAGATATATGGAAGAACACCA 725
Query 181 GTGGCGAAGGCGGCTCTCTGGTCTGCAACTGACGCTGAGGCTCGAAAGCATGGGTAG 237
|||||||||||||||||||||||||||||||||||||||||||||||||||||||||
Sbjct 726 GTGGCGAAGGCGGCTCTCTGGTCTGCAACTGACGCTGAGGCTCGAAAGCATGGGTAG 782
>NR_113638.1 Lactobacillus acidophilus strain NBRC 13951 16S ribosomal RNA,
partial sequence
Length=1489
Score = 438 bits (237), Expect = 6e-123
Identities = 237/237 (100%), Gaps = 0/237 (0%)
Strand=Plus/Plus
Query 1 TGGCAAGCGTTGTCCGGATTTATTGGGCGTAAAGCGAGCGCAGGCGGAAGAATAAGTCTG 60
||||||||||||||||||||||||||||||||||||||||||||||||||||||||||||
Sbjct 537 TGGCAAGCGTTGTCCGGATTTATTGGGCGTAAAGCGAGCGCAGGCGGAAGAATAAGTCTG 596
Query 61 ATGTGAAAGCCCTCGGCTTAACCGAGGAACTGCATCGGAAACTGTTTTTCTTGAGTGCAG 120
||||||||||||||||||||||||||||||||||||||||||||||||||||||||||||
Sbjct 597 ATGTGAAAGCCCTCGGCTTAACCGAGGAACTGCATCGGAAACTGTTTTTCTTGAGTGCAG 656
Query 121 AAGAGGAGAGTGGAACTCCATGTGTAGCGGTGGAATGCGTAGATATATGGAAGAACACCA 180
||||||||||||||||||||||||||||||||||||||||||||||||||||||||||||
Sbjct 657 AAGAGGAGAGTGGAACTCCATGTGTAGCGGTGGAATGCGTAGATATATGGAAGAACACCA 716
Query 181 GTGGCGAAGGCGGCTCTCTGGTCTGCAACTGACGCTGAGGCTCGAAAGCATGGGTAG 237
|||||||||||||||||||||||||||||||||||||||||||||||||||||||||
Sbjct 717 GTGGCGAAGGCGGCTCTCTGGTCTGCAACTGACGCTGAGGCTCGAAAGCATGGGTAG 773
>NR_043182.1 Lactobacillus acidophilus strain BCRC10695 16S ribosomal RNA,
partial sequence
Length=1478
Score = 438 bits (237), Expect = 6e-123
Identities = 237/237 (100%), Gaps = 0/237 (0%)
Strand=Plus/Plus
Query 1 TGGCAAGCGTTGTCCGGATTTATTGGGCGTAAAGCGAGCGCAGGCGGAAGAATAAGTCTG 60
||||||||||||||||||||||||||||||||||||||||||||||||||||||||||||
Sbjct 548 TGGCAAGCGTTGTCCGGATTTATTGGGCGTAAAGCGAGCGCAGGCGGAAGAATAAGTCTG 607
Query 61 ATGTGAAAGCCCTCGGCTTAACCGAGGAACTGCATCGGAAACTGTTTTTCTTGAGTGCAG 120
||||||||||||||||||||||||||||||||||||||||||||||||||||||||||||
Sbjct 608 ATGTGAAAGCCCTCGGCTTAACCGAGGAACTGCATCGGAAACTGTTTTTCTTGAGTGCAG 667
Query 121 AAGAGGAGAGTGGAACTCCATGTGTAGCGGTGGAATGCGTAGATATATGGAAGAACACCA 180
||||||||||||||||||||||||||||||||||||||||||||||||||||||||||||
Sbjct 668 AAGAGGAGAGTGGAACTCCATGTGTAGCGGTGGAATGCGTAGATATATGGAAGAACACCA 727
Query 181 GTGGCGAAGGCGGCTCTCTGGTCTGCAACTGACGCTGAGGCTCGAAAGCATGGGTAG 237
|||||||||||||||||||||||||||||||||||||||||||||||||||||||||
Sbjct 728 GTGGCGAAGGCGGCTCTCTGGTCTGCAACTGACGCTGAGGCTCGAAAGCATGGGTAG 784
>NR_117063.1 Lactobacillus crispatus strain DSM 20584 16S ribosomal RNA, partial
sequence
Length=1516
Score = 438 bits (237), Expect = 6e-123
Identities = 237/237 (100%), Gaps = 0/237 (0%)
Strand=Plus/Plus
Query 1 TGGCAAGCGTTGTCCGGATTTATTGGGCGTAAAGCGAGCGCAGGCGGAAGAATAAGTCTG 60
||||||||||||||||||||||||||||||||||||||||||||||||||||||||||||
Sbjct 527 TGGCAAGCGTTGTCCGGATTTATTGGGCGTAAAGCGAGCGCAGGCGGAAGAATAAGTCTG 586
Query 61 ATGTGAAAGCCCTCGGCTTAACCGAGGAACTGCATCGGAAACTGTTTTTCTTGAGTGCAG 120
||||||||||||||||||||||||||||||||||||||||||||||||||||||||||||
Sbjct 587 ATGTGAAAGCCCTCGGCTTAACCGAGGAACTGCATCGGAAACTGTTTTTCTTGAGTGCAG 646
Query 121 AAGAGGAGAGTGGAACTCCATGTGTAGCGGTGGAATGCGTAGATATATGGAAGAACACCA 180
||||||||||||||||||||||||||||||||||||||||||||||||||||||||||||
Sbjct 647 AAGAGGAGAGTGGAACTCCATGTGTAGCGGTGGAATGCGTAGATATATGGAAGAACACCA 706
Query 181 GTGGCGAAGGCGGCTCTCTGGTCTGCAACTGACGCTGAGGCTCGAAAGCATGGGTAG 237
|||||||||||||||||||||||||||||||||||||||||||||||||||||||||
Sbjct 707 GTGGCGAAGGCGGCTCTCTGGTCTGCAACTGACGCTGAGGCTCGAAAGCATGGGTAG 763
>NR_117062.1 Lactobacillus acidophilus strain VPI 6032 16S ribosomal RNA,
partial sequence
Length=1531
Score = 438 bits (237), Expect = 6e-123
Identities = 237/237 (100%), Gaps = 0/237 (0%)
Strand=Plus/Plus
Query 1 TGGCAAGCGTTGTCCGGATTTATTGGGCGTAAAGCGAGCGCAGGCGGAAGAATAAGTCTG 60
||||||||||||||||||||||||||||||||||||||||||||||||||||||||||||
Sbjct 539 TGGCAAGCGTTGTCCGGATTTATTGGGCGTAAAGCGAGCGCAGGCGGAAGAATAAGTCTG 598
Query 61 ATGTGAAAGCCCTCGGCTTAACCGAGGAACTGCATCGGAAACTGTTTTTCTTGAGTGCAG 120
||||||||||||||||||||||||||||||||||||||||||||||||||||||||||||
Sbjct 599 ATGTGAAAGCCCTCGGCTTAACCGAGGAACTGCATCGGAAACTGTTTTTCTTGAGTGCAG 658
Query 121 AAGAGGAGAGTGGAACTCCATGTGTAGCGGTGGAATGCGTAGATATATGGAAGAACACCA 180
||||||||||||||||||||||||||||||||||||||||||||||||||||||||||||
Sbjct 659 AAGAGGAGAGTGGAACTCCATGTGTAGCGGTGGAATGCGTAGATATATGGAAGAACACCA 718
Query 181 GTGGCGAAGGCGGCTCTCTGGTCTGCAACTGACGCTGAGGCTCGAAAGCATGGGTAG 237
|||||||||||||||||||||||||||||||||||||||||||||||||||||||||
Sbjct 719 GTGGCGAAGGCGGCTCTCTGGTCTGCAACTGACGCTGAGGCTCGAAAGCATGGGTAG 775
>NR_117061.1 Lactobacillus gallinarum strain ATCC 33199 16S ribosomal RNA,
partial sequence
Length=1518
Score = 438 bits (237), Expect = 6e-123
Identities = 237/237 (100%), Gaps = 0/237 (0%)
Strand=Plus/Plus
Query 1 TGGCAAGCGTTGTCCGGATTTATTGGGCGTAAAGCGAGCGCAGGCGGAAGAATAAGTCTG 60
||||||||||||||||||||||||||||||||||||||||||||||||||||||||||||
Sbjct 526 TGGCAAGCGTTGTCCGGATTTATTGGGCGTAAAGCGAGCGCAGGCGGAAGAATAAGTCTG 585
Query 61 ATGTGAAAGCCCTCGGCTTAACCGAGGAACTGCATCGGAAACTGTTTTTCTTGAGTGCAG 120
||||||||||||||||||||||||||||||||||||||||||||||||||||||||||||
Sbjct 586 ATGTGAAAGCCCTCGGCTTAACCGAGGAACTGCATCGGAAACTGTTTTTCTTGAGTGCAG 645
Query 121 AAGAGGAGAGTGGAACTCCATGTGTAGCGGTGGAATGCGTAGATATATGGAAGAACACCA 180
||||||||||||||||||||||||||||||||||||||||||||||||||||||||||||
Sbjct 646 AAGAGGAGAGTGGAACTCCATGTGTAGCGGTGGAATGCGTAGATATATGGAAGAACACCA 705
Query 181 GTGGCGAAGGCGGCTCTCTGGTCTGCAACTGACGCTGAGGCTCGAAAGCATGGGTAG 237
|||||||||||||||||||||||||||||||||||||||||||||||||||||||||
Sbjct 706 GTGGCGAAGGCGGCTCTCTGGTCTGCAACTGACGCTGAGGCTCGAAAGCATGGGTAG 762
>NR_041800.1 Lactobacillus crispatus strain ATCC 33820 16S ribosomal RNA,
partial sequence
Length=1518
Score = 438 bits (237), Expect = 6e-123
Identities = 237/237 (100%), Gaps = 0/237 (0%)
Strand=Plus/Plus
Query 1 TGGCAAGCGTTGTCCGGATTTATTGGGCGTAAAGCGAGCGCAGGCGGAAGAATAAGTCTG 60
||||||||||||||||||||||||||||||||||||||||||||||||||||||||||||
Sbjct 537 TGGCAAGCGTTGTCCGGATTTATTGGGCGTAAAGCGAGCGCAGGCGGAAGAATAAGTCTG 596
Query 61 ATGTGAAAGCCCTCGGCTTAACCGAGGAACTGCATCGGAAACTGTTTTTCTTGAGTGCAG 120
||||||||||||||||||||||||||||||||||||||||||||||||||||||||||||
Sbjct 597 ATGTGAAAGCCCTCGGCTTAACCGAGGAACTGCATCGGAAACTGTTTTTCTTGAGTGCAG 656
Query 121 AAGAGGAGAGTGGAACTCCATGTGTAGCGGTGGAATGCGTAGATATATGGAAGAACACCA 180
||||||||||||||||||||||||||||||||||||||||||||||||||||||||||||
Sbjct 657 AAGAGGAGAGTGGAACTCCATGTGTAGCGGTGGAATGCGTAGATATATGGAAGAACACCA 716
Query 181 GTGGCGAAGGCGGCTCTCTGGTCTGCAACTGACGCTGAGGCTCGAAAGCATGGGTAG 237
|||||||||||||||||||||||||||||||||||||||||||||||||||||||||
Sbjct 717 GTGGCGAAGGCGGCTCTCTGGTCTGCAACTGACGCTGAGGCTCGAAAGCATGGGTAG 773
>NR_113261.1 Lactobacillus gallinarum strain JCM 2011 16S ribosomal RNA, partial
sequence
Length=1486
Score = 438 bits (237), Expect = 6e-123
Identities = 237/237 (100%), Gaps = 0/237 (0%)
Strand=Plus/Plus
Query 1 TGGCAAGCGTTGTCCGGATTTATTGGGCGTAAAGCGAGCGCAGGCGGAAGAATAAGTCTG 60
||||||||||||||||||||||||||||||||||||||||||||||||||||||||||||
Sbjct 537 TGGCAAGCGTTGTCCGGATTTATTGGGCGTAAAGCGAGCGCAGGCGGAAGAATAAGTCTG 596
Query 61 ATGTGAAAGCCCTCGGCTTAACCGAGGAACTGCATCGGAAACTGTTTTTCTTGAGTGCAG 120
||||||||||||||||||||||||||||||||||||||||||||||||||||||||||||
Sbjct 597 ATGTGAAAGCCCTCGGCTTAACCGAGGAACTGCATCGGAAACTGTTTTTCTTGAGTGCAG 656
Query 121 AAGAGGAGAGTGGAACTCCATGTGTAGCGGTGGAATGCGTAGATATATGGAAGAACACCA 180
||||||||||||||||||||||||||||||||||||||||||||||||||||||||||||
Sbjct 657 AAGAGGAGAGTGGAACTCCATGTGTAGCGGTGGAATGCGTAGATATATGGAAGAACACCA 716
Query 181 GTGGCGAAGGCGGCTCTCTGGTCTGCAACTGACGCTGAGGCTCGAAAGCATGGGTAG 237
|||||||||||||||||||||||||||||||||||||||||||||||||||||||||
Sbjct 717 GTGGCGAAGGCGGCTCTCTGGTCTGCAACTGACGCTGAGGCTCGAAAGCATGGGTAG 773
>NR_117812.1 Lactobacillus acidophilus strain JCM 1132 16S ribosomal RNA,
partial sequence
Length=1453
Score = 438 bits (237), Expect = 6e-123
Identities = 237/237 (100%), Gaps = 0/237 (0%)
Strand=Plus/Plus
Query 1 TGGCAAGCGTTGTCCGGATTTATTGGGCGTAAAGCGAGCGCAGGCGGAAGAATAAGTCTG 60
||||||||||||||||||||||||||||||||||||||||||||||||||||||||||||
Sbjct 522 TGGCAAGCGTTGTCCGGATTTATTGGGCGTAAAGCGAGCGCAGGCGGAAGAATAAGTCTG 581
Query 61 ATGTGAAAGCCCTCGGCTTAACCGAGGAACTGCATCGGAAACTGTTTTTCTTGAGTGCAG 120
||||||||||||||||||||||||||||||||||||||||||||||||||||||||||||
Sbjct 582 ATGTGAAAGCCCTCGGCTTAACCGAGGAACTGCATCGGAAACTGTTTTTCTTGAGTGCAG 641
Query 121 AAGAGGAGAGTGGAACTCCATGTGTAGCGGTGGAATGCGTAGATATATGGAAGAACACCA 180
||||||||||||||||||||||||||||||||||||||||||||||||||||||||||||
Sbjct 642 AAGAGGAGAGTGGAACTCCATGTGTAGCGGTGGAATGCGTAGATATATGGAAGAACACCA 701
Query 181 GTGGCGAAGGCGGCTCTCTGGTCTGCAACTGACGCTGAGGCTCGAAAGCATGGGTAG 237
|||||||||||||||||||||||||||||||||||||||||||||||||||||||||
Sbjct 702 GTGGCGAAGGCGGCTCTCTGGTCTGCAACTGACGCTGAGGCTCGAAAGCATGGGTAG 758
>NR_024813.1 Lactobacillus kitasatonis strain JCM 1039 16S ribosomal RNA,
partial sequence
Length=1506
Score = 433 bits (234), Expect = 3e-121
Identities = 236/237 (99%), Gaps = 0/237 (0%)
Strand=Plus/Plus
Query 1 TGGCAAGCGTTGTCCGGATTTATTGGGCGTAAAGCGAGCGCAGGCGGAAGAATAAGTCTG 60
||||||||||||||||||||||||||||||||||||||||||||||||| ||||||||||
Sbjct 537 TGGCAAGCGTTGTCCGGATTTATTGGGCGTAAAGCGAGCGCAGGCGGAAAAATAAGTCTG 596
Query 61 ATGTGAAAGCCCTCGGCTTAACCGAGGAACTGCATCGGAAACTGTTTTTCTTGAGTGCAG 120
||||||||||||||||||||||||||||||||||||||||||||||||||||||||||||
Sbjct 597 ATGTGAAAGCCCTCGGCTTAACCGAGGAACTGCATCGGAAACTGTTTTTCTTGAGTGCAG 656
Query 121 AAGAGGAGAGTGGAACTCCATGTGTAGCGGTGGAATGCGTAGATATATGGAAGAACACCA 180
||||||||||||||||||||||||||||||||||||||||||||||||||||||||||||
Sbjct 657 AAGAGGAGAGTGGAACTCCATGTGTAGCGGTGGAATGCGTAGATATATGGAAGAACACCA 716
Query 181 GTGGCGAAGGCGGCTCTCTGGTCTGCAACTGACGCTGAGGCTCGAAAGCATGGGTAG 237
|||||||||||||||||||||||||||||||||||||||||||||||||||||||||
Sbjct 717 GTGGCGAAGGCGGCTCTCTGGTCTGCAACTGACGCTGAGGCTCGAAAGCATGGGTAG 773
>NR_042802.1 Lactobacillus ultunensis strain Kx146C1 16S ribosomal RNA, partial
sequence
Length=1550
Score = 427 bits (231), Expect = 1e-119
Identities = 235/237 (99%), Gaps = 0/237 (0%)
Strand=Plus/Plus
Query 1 TGGCAAGCGTTGTCCGGATTTATTGGGCGTAAAGCGAGCGCAGGCGGAAGAATAAGTCTG 60
||||||||||||||||||||||||||||||||||||||||||||||||| |||||||||
Sbjct 554 TGGCAAGCGTTGTCCGGATTTATTGGGCGTAAAGCGAGCGCAGGCGGAAAAATAAGTCTA 613
Query 61 ATGTGAAAGCCCTCGGCTTAACCGAGGAACTGCATCGGAAACTGTTTTTCTTGAGTGCAG 120
||||||||||||||||||||||||||||||||||||||||||||||||||||||||||||
Sbjct 614 ATGTGAAAGCCCTCGGCTTAACCGAGGAACTGCATCGGAAACTGTTTTTCTTGAGTGCAG 673
Query 121 AAGAGGAGAGTGGAACTCCATGTGTAGCGGTGGAATGCGTAGATATATGGAAGAACACCA 180
||||||||||||||||||||||||||||||||||||||||||||||||||||||||||||
Sbjct 674 AAGAGGAGAGTGGAACTCCATGTGTAGCGGTGGAATGCGTAGATATATGGAAGAACACCA 733
Query 181 GTGGCGAAGGCGGCTCTCTGGTCTGCAACTGACGCTGAGGCTCGAAAGCATGGGTAG 237
|||||||||||||||||||||||||||||||||||||||||||||||||||||||||
Sbjct 734 GTGGCGAAGGCGGCTCTCTGGTCTGCAACTGACGCTGAGGCTCGAAAGCATGGGTAG 790
>NR_043287.1 Lactobacillus amylovorus DSM 20531 16S ribosomal RNA, partial
sequence
Length=1504
Score = 427 bits (231), Expect = 1e-119
Identities = 235/237 (99%), Gaps = 0/237 (0%)
Strand=Plus/Plus
Query 1 TGGCAAGCGTTGTCCGGATTTATTGGGCGTAAAGCGAGCGCAGGCGGAAGAATAAGTCTG 60
||||||||||||||||||||||||||||||||||||||||||||||||| |||||||||
Sbjct 557 TGGCAAGCGTTGTCCGGATTTATTGGGCGTAAAGCGAGCGCAGGCGGAAAAATAAGTCTA 616
Query 61 ATGTGAAAGCCCTCGGCTTAACCGAGGAACTGCATCGGAAACTGTTTTTCTTGAGTGCAG 120
||||||||||||||||||||||||||||||||||||||||||||||||||||||||||||
Sbjct 617 ATGTGAAAGCCCTCGGCTTAACCGAGGAACTGCATCGGAAACTGTTTTTCTTGAGTGCAG 676
Query 121 AAGAGGAGAGTGGAACTCCATGTGTAGCGGTGGAATGCGTAGATATATGGAAGAACACCA 180
||||||||||||||||||||||||||||||||||||||||||||||||||||||||||||
Sbjct 677 AAGAGGAGAGTGGAACTCCATGTGTAGCGGTGGAATGCGTAGATATATGGAAGAACACCA 736
Query 181 GTGGCGAAGGCGGCTCTCTGGTCTGCAACTGACGCTGAGGCTCGAAAGCATGGGTAG 237
|||||||||||||||||||||||||||||||||||||||||||||||||||||||||
Sbjct 737 GTGGCGAAGGCGGCTCTCTGGTCTGCAACTGACGCTGAGGCTCGAAAGCATGGGTAG 793
>NR_025448.1 Lactobacillus hamsteri strain DSM 5661 16S ribosomal RNA, partial
sequence
Length=1510
Score = 427 bits (231), Expect = 1e-119
Identities = 235/237 (99%), Gaps = 0/237 (0%)
Strand=Plus/Plus
Query 1 TGGCAAGCGTTGTCCGGATTTATTGGGCGTAAAGCGAGCGCAGGCGGAAGAATAAGTCTG 60
||||||||||||||||||||||||||||||||||||||||||||||||||||||||||||
Sbjct 538 TGGCAAGCGTTGTCCGGATTTATTGGGCGTAAAGCGAGCGCAGGCGGAAGAATAAGTCTG 597
Query 61 ATGTGAAAGCCCTCGGCTTAACCGAGGAACTGCATCGGAAACTGTTTTTCTTGAGTGCAG 120
|||||||||||||||||||||||| |||| ||||||||||||||||||||||||||||||
Sbjct 598 ATGTGAAAGCCCTCGGCTTAACCGGGGAAGTGCATCGGAAACTGTTTTTCTTGAGTGCAG 657
Query 121 AAGAGGAGAGTGGAACTCCATGTGTAGCGGTGGAATGCGTAGATATATGGAAGAACACCA 180
||||||||||||||||||||||||||||||||||||||||||||||||||||||||||||
Sbjct 658 AAGAGGAGAGTGGAACTCCATGTGTAGCGGTGGAATGCGTAGATATATGGAAGAACACCA 717
Query 181 GTGGCGAAGGCGGCTCTCTGGTCTGCAACTGACGCTGAGGCTCGAAAGCATGGGTAG 237
|||||||||||||||||||||||||||||||||||||||||||||||||||||||||
Sbjct 718 GTGGCGAAGGCGGCTCTCTGGTCTGCAACTGACGCTGAGGCTCGAAAGCATGGGTAG 774
>NR_113719.1 Lactobacillus helveticus strain NBRC 15019 16S ribosomal RNA,
partial sequence
Length=1487
Score = 427 bits (231), Expect = 1e-119
Identities = 235/237 (99%), Gaps = 0/237 (0%)
Strand=Plus/Plus
Query 1 TGGCAAGCGTTGTCCGGATTTATTGGGCGTAAAGCGAGCGCAGGCGGAAGAATAAGTCTG 60
||||||||||||||||||||||||||||||||||||||||||||||||||||||||||||
Sbjct 536 TGGCAAGCGTTGTCCGGATTTATTGGGCGTAAAGCGAGCGCAGGCGGAAGAATAAGTCTG 595
Query 61 ATGTGAAAGCCCTCGGCTTAACCGAGGAACTGCATCGGAAACTGTTTTTCTTGAGTGCAG 120
||||||||||||||||||||||||||||||||||||||||||||||||||||||||||||
Sbjct 596 ATGTGAAAGCCCTCGGCTTAACCGAGGAACTGCATCGGAAACTGTTTTTCTTGAGTGCAG 655
Query 121 AAGAGGAGAGTGGAACTCCATGTGTAGCGGTGGAATGCGTAGATATATGGAAGAACACCA 180
||||||||||||||| ||||||||||||||||||||||||||||||||||||||||||||
Sbjct 656 AAGAGGAGAGTGGAATTCCATGTGTAGCGGTGGAATGCGTAGATATATGGAAGAACACCA 715
Query 181 GTGGCGAAGGCGGCTCTCTGGTCTGCAACTGACGCTGAGGCTCGAAAGCATGGGTAG 237
|||||||||||| ||||||||||||||||||||||||||||||||||||||||||||
Sbjct 716 GTGGCGAAGGCGACTCTCTGGTCTGCAACTGACGCTGAGGCTCGAAAGCATGGGTAG 772
>NR_117068.1 Lactobacillus hamsteri strain JCM 6256 16S ribosomal RNA, partial
sequence
Length=1494
Score = 427 bits (231), Expect = 1e-119
Identities = 235/237 (99%), Gaps = 0/237 (0%)
Strand=Plus/Plus
Query 1 TGGCAAGCGTTGTCCGGATTTATTGGGCGTAAAGCGAGCGCAGGCGGAAGAATAAGTCTG 60
||||||||||||||||||||||||||||||||||||||||||||||||||||||||||||
Sbjct 503 TGGCAAGCGTTGTCCGGATTTATTGGGCGTAAAGCGAGCGCAGGCGGAAGAATAAGTCTG 562
Query 61 ATGTGAAAGCCCTCGGCTTAACCGAGGAACTGCATCGGAAACTGTTTTTCTTGAGTGCAG 120
|||||||||||||||||||||||| |||| ||||||||||||||||||||||||||||||
Sbjct 563 ATGTGAAAGCCCTCGGCTTAACCGGGGAAGTGCATCGGAAACTGTTTTTCTTGAGTGCAG 622
Query 121 AAGAGGAGAGTGGAACTCCATGTGTAGCGGTGGAATGCGTAGATATATGGAAGAACACCA 180
||||||||||||||||||||||||||||||||||||||||||||||||||||||||||||
Sbjct 623 AAGAGGAGAGTGGAACTCCATGTGTAGCGGTGGAATGCGTAGATATATGGAAGAACACCA 682
Query 181 GTGGCGAAGGCGGCTCTCTGGTCTGCAACTGACGCTGAGGCTCGAAAGCATGGGTAG 237
|||||||||||||||||||||||||||||||||||||||||||||||||||||||||
Sbjct 683 GTGGCGAAGGCGGCTCTCTGGTCTGCAACTGACGCTGAGGCTCGAAAGCATGGGTAG 739
>NR_117065.1 Lactobacillus ultunensis strain CCUG 48460 16S ribosomal RNA,
partial sequence
Length=1502
Score = 427 bits (231), Expect = 1e-119
Identities = 235/237 (99%), Gaps = 0/237 (0%)
Strand=Plus/Plus
Query 1 TGGCAAGCGTTGTCCGGATTTATTGGGCGTAAAGCGAGCGCAGGCGGAAGAATAAGTCTG 60
||||||||||||||||||||||||||||||||||||||||||||||||| |||||||||
Sbjct 513 TGGCAAGCGTTGTCCGGATTTATTGGGCGTAAAGCGAGCGCAGGCGGAAAAATAAGTCTA 572
Query 61 ATGTGAAAGCCCTCGGCTTAACCGAGGAACTGCATCGGAAACTGTTTTTCTTGAGTGCAG 120
||||||||||||||||||||||||||||||||||||||||||||||||||||||||||||
Sbjct 573 ATGTGAAAGCCCTCGGCTTAACCGAGGAACTGCATCGGAAACTGTTTTTCTTGAGTGCAG 632
Query 121 AAGAGGAGAGTGGAACTCCATGTGTAGCGGTGGAATGCGTAGATATATGGAAGAACACCA 180
||||||||||||||||||||||||||||||||||||||||||||||||||||||||||||
Sbjct 633 AAGAGGAGAGTGGAACTCCATGTGTAGCGGTGGAATGCGTAGATATATGGAAGAACACCA 692
Query 181 GTGGCGAAGGCGGCTCTCTGGTCTGCAACTGACGCTGAGGCTCGAAAGCATGGGTAG 237
|||||||||||||||||||||||||||||||||||||||||||||||||||||||||
Sbjct 693 GTGGCGAAGGCGGCTCTCTGGTCTGCAACTGACGCTGAGGCTCGAAAGCATGGGTAG 749
>NR_117064.1 Lactobacillus amylovorus DSM 20531 16S ribosomal RNA, partial
sequence
Length=1516
Score = 427 bits (231), Expect = 1e-119
Identities = 235/237 (99%), Gaps = 0/237 (0%)
Strand=Plus/Plus
Query 1 TGGCAAGCGTTGTCCGGATTTATTGGGCGTAAAGCGAGCGCAGGCGGAAGAATAAGTCTG 60
||||||||||||||||||||||||||||||||||||||||||||||||| |||||||||
Sbjct 529 TGGCAAGCGTTGTCCGGATTTATTGGGCGTAAAGCGAGCGCAGGCGGAAAAATAAGTCTA 588
Query 61 ATGTGAAAGCCCTCGGCTTAACCGAGGAACTGCATCGGAAACTGTTTTTCTTGAGTGCAG 120
||||||||||||||||||||||||||||||||||||||||||||||||||||||||||||
Sbjct 589 ATGTGAAAGCCCTCGGCTTAACCGAGGAACTGCATCGGAAACTGTTTTTCTTGAGTGCAG 648
Query 121 AAGAGGAGAGTGGAACTCCATGTGTAGCGGTGGAATGCGTAGATATATGGAAGAACACCA 180
||||||||||||||||||||||||||||||||||||||||||||||||||||||||||||
Sbjct 649 AAGAGGAGAGTGGAACTCCATGTGTAGCGGTGGAATGCGTAGATATATGGAAGAACACCA 708
Query 181 GTGGCGAAGGCGGCTCTCTGGTCTGCAACTGACGCTGAGGCTCGAAAGCATGGGTAG 237
|||||||||||||||||||||||||||||||||||||||||||||||||||||||||
Sbjct 709 GTGGCGAAGGCGGCTCTCTGGTCTGCAACTGACGCTGAGGCTCGAAAGCATGGGTAG 765
>NR_117060.1 Lactobacillus helveticus DSM 20075 = CGMCC 1.1877 16S ribosomal
RNA, partial sequence
Length=1516
Score = 427 bits (231), Expect = 1e-119
Identities = 235/237 (99%), Gaps = 0/237 (0%)
Strand=Plus/Plus
Query 1 TGGCAAGCGTTGTCCGGATTTATTGGGCGTAAAGCGAGCGCAGGCGGAAGAATAAGTCTG 60
||||||||||||||||||||||||||||||||||||||||||||||||||||||||||||
Sbjct 525 TGGCAAGCGTTGTCCGGATTTATTGGGCGTAAAGCGAGCGCAGGCGGAAGAATAAGTCTG 584
Query 61 ATGTGAAAGCCCTCGGCTTAACCGAGGAACTGCATCGGAAACTGTTTTTCTTGAGTGCAG 120
||||||||||||||||||||||||||||||||||||||||||||||||||||||||||||
Sbjct 585 ATGTGAAAGCCCTCGGCTTAACCGAGGAACTGCATCGGAAACTGTTTTTCTTGAGTGCAG 644
Query 121 AAGAGGAGAGTGGAACTCCATGTGTAGCGGTGGAATGCGTAGATATATGGAAGAACACCA 180
||||||||||||||| ||||||||||||||||||||||||||||||||||||||||||||
Sbjct 645 AAGAGGAGAGTGGAATTCCATGTGTAGCGGTGGAATGCGTAGATATATGGAAGAACACCA 704
Query 181 GTGGCGAAGGCGGCTCTCTGGTCTGCAACTGACGCTGAGGCTCGAAAGCATGGGTAG 237
|||||||||||| ||||||||||||||||||||||||||||||||||||||||||||
Sbjct 705 GTGGCGAAGGCGACTCTCTGGTCTGCAACTGACGCTGAGGCTCGAAAGCATGGGTAG 761
>NR_042439.1 Lactobacillus helveticus DSM 20075 = CGMCC 1.1877 16S ribosomal
RNA, partial sequence
Length=1554
Score = 427 bits (231), Expect = 1e-119
Identities = 235/237 (99%), Gaps = 0/237 (0%)
Strand=Plus/Plus
Query 1 TGGCAAGCGTTGTCCGGATTTATTGGGCGTAAAGCGAGCGCAGGCGGAAGAATAAGTCTG 60
||||||||||||||||||||||||||||||||||||||||||||||||||||||||||||
Sbjct 557 TGGCAAGCGTTGTCCGGATTTATTGGGCGTAAAGCGAGCGCAGGCGGAAGAATAAGTCTG 616
Query 61 ATGTGAAAGCCCTCGGCTTAACCGAGGAACTGCATCGGAAACTGTTTTTCTTGAGTGCAG 120
||||||||||||||||||||||||||||||||||||||||||||||||||||||||||||
Sbjct 617 ATGTGAAAGCCCTCGGCTTAACCGAGGAACTGCATCGGAAACTGTTTTTCTTGAGTGCAG 676
Query 121 AAGAGGAGAGTGGAACTCCATGTGTAGCGGTGGAATGCGTAGATATATGGAAGAACACCA 180
||||||||||||||| ||||||||||||||||||||||||||||||||||||||||||||
Sbjct 677 AAGAGGAGAGTGGAATTCCATGTGTAGCGGTGGAATGCGTAGATATATGGAAGAACACCA 736
Query 181 GTGGCGAAGGCGGCTCTCTGGTCTGCAACTGACGCTGAGGCTCGAAAGCATGGGTAG 237
|||||||||||| ||||||||||||||||||||||||||||||||||||||||||||
Sbjct 737 GTGGCGAAGGCGACTCTCTGGTCTGCAACTGACGCTGAGGCTCGAAAGCATGGGTAG 793
Database: 16S ribosomal RNA (Bacteria and Archaea)
Posted date: Jul 4, 2020 11:48 PM
Number of letters in database: 31,458,948
Number of sequences in database: 21,632
Lambda K H
1.33 0.621 1.12
Gapped
Lambda K H
1.28 0.460 0.850
Matrix: blastn matrix:1 -2
Gap Penalties: Existence: 0, Extension: 0
Number of Sequences: 21632
Number of Hits to DB: 470719
Number of extensions: 23368
Number of successful extensions: 23368
Number of sequences better than 10: 9683
Number of HSP's better than 10 without gapping: 0
Number of HSP's gapped: 21694
Number of HSP's successfully gapped: 21694
Length of database: 31458948
A: 0
X1: 13 (25.0 bits)
X2: 32 (59.1 bits)
X3: 54 (99.7 bits)
S1: 13 (25.1 bits)

## Sheet: Genus_Megasphaera_22
Database: 16S ribosomal RNA (Bacteria and Archaea)
21,632 sequences; 31,458,767 total letters
Query= Genus_Megasphaera_22|74873ee2f32a9c499974f178cdd9ebba
LOWER IDENTITY THRESHOLD THAT OTHER ASV
Length=236
Score E Max
Sequences producing significant alignments: (Bits) Value Ident
NR_133027.1 Megasphaera massiliensis strain NP3 16S ribosomal ... 370 2e-102 95%
NR_044650.1 Megasphaera cerevisiae strain VTT-E-85230 16S ribo... 364 9e-101 94%
NR_102980.1 Megasphaera elsdenii DSM 20460 16S ribosomal RNA, ... 364 9e-101 95%
NR_113307.1 Megasphaera cerevisiae DSM 20462 16S ribosomal RNA... 364 9e-101 94%
NR_113306.1 Megasphaera elsdenii DSM 20460 16S ribosomal RNA, ... 364 9e-101 95%
NR_113305.1 Megasphaera elsdenii DSM 20460 16S ribosomal RNA, ... 364 9e-101 95%
NR_114538.1 Veillonella ratti strain ATCC 17746 16S ribosomal ... 359 4e-99 94%
NR_134226.1 Veillonella seminalis strain ADV 4313.2 16S riboso... 359 4e-99 94%
NR_113377.1 Veillonella ratti strain JCM 6512 16S ribosomal RN... 359 4e-99 94%
NR_029101.1 Veillonella ratti strain RV-12x 16S ribosomal RNA,... 359 4e-99 94%
NR_029207.1 Megasphaera elsdenii strain LC 1 16S ribosomal RNA... 357 2e-98 94%
NR_043656.1 Megasphaera sueciensis strain VTT E-97791 16S ribo... 350 3e-96 94%
ALIGNMENTS
>NR_133027.1 Megasphaera massiliensis strain NP3 16S ribosomal RNA, partial
sequence
Length=1519
Score = 370 bits (200), Expect = 2e-102
Identities = 226/238 (95%), Gaps = 4/238 (2%)
Strand=Plus/Plus
Query 1 TGGCAAGCGTTGTCCGGAATTATTGGGCGTAAAGGGCGCGCAGGCGG-TTCGGTAAGTCT 59
||||||||||||||||||||||||||||||||||||||||||||||| || | |||||
Sbjct 552 TGGCAAGCGTTGTCCGGAATTATTGGGCGTAAAGGGCGCGCAGGCGGCATC-GCAAGTCG 610
Query 60 GTCTTAAAAGTGCGGGGCTTAACCCCGTGAGGGGACGGAAACTGTCGAA-CTTGAGTGTC 118
|||||||||||||||||||||||||||||||||||| |||||||| ||| || |||||||
Sbjct 611 GTCTTAAAAGTGCGGGGCTTAACCCCGTGAGGGGACCGAAACTGT-GAAGCTCGAGTGTC 669
Query 119 GGAGAGGAAAGCGGAATTCCTAGTGTAGCGGTGAAATGCGTAGATATTAGGAGGAACACC 178
||||||||||||||||||||||||||||||||||||||||||||||||||||||||||||
Sbjct 670 GGAGAGGAAAGCGGAATTCCTAGTGTAGCGGTGAAATGCGTAGATATTAGGAGGAACACC 729
Query 179 GGTGGCGAAAGCGGCTTTCTGGACGACAACTGACGCTGAGGCGCGAAAGCGTGGGGAG 236
||||||||||||||||||||||||||||||||||||||||||||||||| ||||||
Sbjct 730 AGTGGCGAAAGCGGCTTTCTGGACGACAACTGACGCTGAGGCGCGAAAGCCAGGGGAG 787
>NR_044650.1 Megasphaera cerevisiae strain VTT-E-85230 16S ribosomal RNA,
partial sequence
Length=1377
Score = 364 bits (197), Expect = 9e-101
Identities = 223/236 (94%), Gaps = 0/236 (0%)
Strand=Plus/Plus
Query 1 TGGCAAGCGTTGTCCGGAATTATTGGGCGTAAAGGGCGCGCAGGCGGTTCGGTAAGTCTG 60
|||||||||||||||||||| ||||||||||||||||||||||||||||||||||||| |
Sbjct 461 TGGCAAGCGTTGTCCGGAATCATTGGGCGTAAAGGGCGCGCAGGCGGTTCGGTAAGTCGG 520
Query 61 TCTTAAAAGTGCGGGGCTTAACCCCGTGAGGGGACGGAAACTGTCGAACTTGAGTGTCGG 120
||||||||||||||||||||||||||||| |||| ||||||| || ||| |||||||||
Sbjct 521 TCTTAAAAGTGCGGGGCTTAACCCCGTGATGGGATTGAAACTGCCGGACTGGAGTGTCGG 580
Query 121 AGAGGAAAGCGGAATTCCTAGTGTAGCGGTGAAATGCGTAGATATTAGGAGGAACACCGG 180
|||||||||| ||||||||||||||||||||||||||||||||||||||||||| ||| |
Sbjct 581 AGAGGAAAGCAGAATTCCTAGTGTAGCGGTGAAATGCGTAGATATTAGGAGGAATACCAG 640
Query 181 TGGCGAAAGCGGCTTTCTGGACGACAACTGACGCTGAGGCGCGAAAGCGTGGGGAG 236
|||||||||||||||||||||||||||||||||||||||||||||||| ||||||
Sbjct 641 TGGCGAAAGCGGCTTTCTGGACGACAACTGACGCTGAGGCGCGAAAGCCAGGGGAG 696
>NR_102980.1 Megasphaera elsdenii DSM 20460 16S ribosomal RNA, partial sequence
Length=1552
Score = 364 bits (197), Expect = 9e-101
Identities = 225/238 (95%), Gaps = 4/238 (2%)
Strand=Plus/Plus
Query 1 TGGCAAGCGTTGTCCGGAATTATTGGGCGTAAAGGGCGCGCAGGCGG-TTCGGTAAGTCT 59
||||||||||||||||||||||||||||||||||||||||||||||| || |||||||
Sbjct 554 TGGCAAGCGTTGTCCGGAATTATTGGGCGTAAAGGGCGCGCAGGCGGCGTC-GTAAGTCG 612
Query 60 GTCTTAAAAGTGCGGGGCTTAACCCCGTGAGGGGACGGAAACTGTCGA-ACTTGAGTGTC 118
|||||||||||||||||||||||||||||||||||| ||||||| ||| || |||| ||
Sbjct 613 GTCTTAAAAGTGCGGGGCTTAACCCCGTGAGGGGACCGAAACTG-CGATGCTAGAGTATC 671
Query 119 GGAGAGGAAAGCGGAATTCCTAGTGTAGCGGTGAAATGCGTAGATATTAGGAGGAACACC 178
||||||||||||||||||||||||||||||||||||||||||||||||||||||||||||
Sbjct 672 GGAGAGGAAAGCGGAATTCCTAGTGTAGCGGTGAAATGCGTAGATATTAGGAGGAACACC 731
Query 179 GGTGGCGAAAGCGGCTTTCTGGACGACAACTGACGCTGAGGCGCGAAAGCGTGGGGAG 236
||||||||||||||||||||||||||||||||||||||||||||||||| ||||||
Sbjct 732 AGTGGCGAAAGCGGCTTTCTGGACGACAACTGACGCTGAGGCGCGAAAGCCAGGGGAG 789
>NR_113307.1 Megasphaera cerevisiae DSM 20462 16S ribosomal RNA, partial sequence
Length=1178
Score = 364 bits (197), Expect = 9e-101
Identities = 223/236 (94%), Gaps = 0/236 (0%)
Strand=Plus/Plus
Query 1 TGGCAAGCGTTGTCCGGAATTATTGGGCGTAAAGGGCGCGCAGGCGGTTCGGTAAGTCTG 60
|||||||||||||||||||| ||||||||||||||||||||||||||||||||||||| |
Sbjct 419 TGGCAAGCGTTGTCCGGAATCATTGGGCGTAAAGGGCGCGCAGGCGGTTCGGTAAGTCGG 478
Query 61 TCTTAAAAGTGCGGGGCTTAACCCCGTGAGGGGACGGAAACTGTCGAACTTGAGTGTCGG 120
||||||||||||||||||||||||||||| |||| ||||||| || ||| |||||||||
Sbjct 479 TCTTAAAAGTGCGGGGCTTAACCCCGTGATGGGATTGAAACTGCCGGACTGGAGTGTCGG 538
Query 121 AGAGGAAAGCGGAATTCCTAGTGTAGCGGTGAAATGCGTAGATATTAGGAGGAACACCGG 180
|||||||||| ||||||||||||||||||||||||||||||||||||||||||| ||| |
Sbjct 539 AGAGGAAAGCAGAATTCCTAGTGTAGCGGTGAAATGCGTAGATATTAGGAGGAATACCAG 598
Query 181 TGGCGAAAGCGGCTTTCTGGACGACAACTGACGCTGAGGCGCGAAAGCGTGGGGAG 236
|||||||||||||||||||||||||||||||||||||||||||||||| ||||||
Sbjct 599 TGGCGAAAGCGGCTTTCTGGACGACAACTGACGCTGAGGCGCGAAAGCCAGGGGAG 654
>NR_113306.1 Megasphaera elsdenii DSM 20460 16S ribosomal RNA, partial sequence
Length=1174
Score = 364 bits (197), Expect = 9e-101
Identities = 225/238 (95%), Gaps = 4/238 (2%)
Strand=Plus/Plus
Query 1 TGGCAAGCGTTGTCCGGAATTATTGGGCGTAAAGGGCGCGCAGGCGG-TTCGGTAAGTCT 59
||||||||||||||||||||||||||||||||||||||||||||||| || |||||||
Sbjct 417 TGGCAAGCGTTGTCCGGAATTATTGGGCGTAAAGGGCGCGCAGGCGGCGTC-GTAAGTCG 475
Query 60 GTCTTAAAAGTGCGGGGCTTAACCCCGTGAGGGGACGGAAACTGTCGA-ACTTGAGTGTC 118
|||||||||||||||||||||||||||||||||||| ||||||| ||| || |||| ||
Sbjct 476 GTCTTAAAAGTGCGGGGCTTAACCCCGTGAGGGGACCGAAACTG-CGATGCTAGAGTATC 534
Query 119 GGAGAGGAAAGCGGAATTCCTAGTGTAGCGGTGAAATGCGTAGATATTAGGAGGAACACC 178
||||||||||||||||||||||||||||||||||||||||||||||||||||||||||||
Sbjct 535 GGAGAGGAAAGCGGAATTCCTAGTGTAGCGGTGAAATGCGTAGATATTAGGAGGAACACC 594
Query 179 GGTGGCGAAAGCGGCTTTCTGGACGACAACTGACGCTGAGGCGCGAAAGCGTGGGGAG 236
||||||||||||||||||||||||||||||||||||||||||||||||| ||||||
Sbjct 595 AGTGGCGAAAGCGGCTTTCTGGACGACAACTGACGCTGAGGCGCGAAAGCCAGGGGAG 652
>NR_113305.1 Megasphaera elsdenii DSM 20460 16S ribosomal RNA, partial sequence
Length=1174
Score = 364 bits (197), Expect = 9e-101
Identities = 225/238 (95%), Gaps = 4/238 (2%)
Strand=Plus/Plus
Query 1 TGGCAAGCGTTGTCCGGAATTATTGGGCGTAAAGGGCGCGCAGGCGG-TTCGGTAAGTCT 59
||||||||||||||||||||||||||||||||||||||||||||||| || |||||||
Sbjct 417 TGGCAAGCGTTGTCCGGAATTATTGGGCGTAAAGGGCGCGCAGGCGGCGTC-GTAAGTCG 475
Query 60 GTCTTAAAAGTGCGGGGCTTAACCCCGTGAGGGGACGGAAACTGTCGA-ACTTGAGTGTC 118
|||||||||||||||||||||||||||||||||||| ||||||| ||| || |||| ||
Sbjct 476 GTCTTAAAAGTGCGGGGCTTAACCCCGTGAGGGGACCGAAACTG-CGATGCTAGAGTATC 534
Query 119 GGAGAGGAAAGCGGAATTCCTAGTGTAGCGGTGAAATGCGTAGATATTAGGAGGAACACC 178
||||||||||||||||||||||||||||||||||||||||||||||||||||||||||||
Sbjct 535 GGAGAGGAAAGCGGAATTCCTAGTGTAGCGGTGAAATGCGTAGATATTAGGAGGAACACC 594
Query 179 GGTGGCGAAAGCGGCTTTCTGGACGACAACTGACGCTGAGGCGCGAAAGCGTGGGGAG 236
||||||||||||||||||||||||||||||||||||||||||||||||| ||||||
Sbjct 595 AGTGGCGAAAGCGGCTTTCTGGACGACAACTGACGCTGAGGCGCGAAAGCCAGGGGAG 652
>NR_114538.1 Veillonella ratti strain ATCC 17746 16S ribosomal RNA, partial
sequence
Length=1509
Score = 359 bits (194), Expect = 4e-99
Identities = 222/236 (94%), Gaps = 0/236 (0%)
Strand=Plus/Plus
Query 1 TGGCAAGCGTTGTCCGGAATTATTGGGCGTAAAGGGCGCGCAGGCGGTTCGGTAAGTCTG 60
|||||||||||||||||||||||||||||||||| |||||||||||||| ||||||||
Sbjct 532 TGGCAAGCGTTGTCCGGAATTATTGGGCGTAAAGCGCGCGCAGGCGGTTTCATAAGTCTG 591
Query 61 TCTTAAAAGTGCGGGGCTTAACCCCGTGAGGGGACGGAAACTGTCGAACTTGAGTGTCGG 120
|||||||||||||||||||||||||||||||||| ||||||| | ||||| |||| ||||
Sbjct 592 TCTTAAAAGTGCGGGGCTTAACCCCGTGAGGGGATGGAAACTATGGAACTGGAGTATCGG 651
Query 121 AGAGGAAAGCGGAATTCCTAGTGTAGCGGTGAAATGCGTAGATATTAGGAGGAACACCGG 180
|||||||||||||||||||||||||||||||||||||||||||||||||| ||||||| |
Sbjct 652 AGAGGAAAGCGGAATTCCTAGTGTAGCGGTGAAATGCGTAGATATTAGGAAGAACACCAG 711
Query 181 TGGCGAAAGCGGCTTTCTGGACGACAACTGACGCTGAGGCGCGAAAGCGTGGGGAG 236
||||||| |||||||||||||||||||||||||||||||||||||||| ||||||
Sbjct 712 TGGCGAAGGCGGCTTTCTGGACGACAACTGACGCTGAGGCGCGAAAGCCAGGGGAG 767
>NR_134226.1 Veillonella seminalis strain ADV 4313.2 16S ribosomal RNA, partial
sequence
Length=1343
Score = 359 bits (194), Expect = 4e-99
Identities = 222/236 (94%), Gaps = 0/236 (0%)
Strand=Plus/Plus
Query 1 TGGCAAGCGTTGTCCGGAATTATTGGGCGTAAAGGGCGCGCAGGCGGTTCGGTAAGTCTG 60
|||||||||||||||||||||||||||||||||| |||||||||||||| ||||||||
Sbjct 466 TGGCAAGCGTTGTCCGGAATTATTGGGCGTAAAGCGCGCGCAGGCGGTTTCATAAGTCTG 525
Query 61 TCTTAAAAGTGCGGGGCTTAACCCCGTGAGGGGACGGAAACTGTCGAACTTGAGTGTCGG 120
|||||||||||||||||||||||||||||||||| ||||||| | ||||| |||| ||||
Sbjct 526 TCTTAAAAGTGCGGGGCTTAACCCCGTGAGGGGATGGAAACTATGGAACTGGAGTATCGG 585
Query 121 AGAGGAAAGCGGAATTCCTAGTGTAGCGGTGAAATGCGTAGATATTAGGAGGAACACCGG 180
|||||||||||||||||||||||||||||||||||||||||||||||||| ||||||| |
Sbjct 586 AGAGGAAAGCGGAATTCCTAGTGTAGCGGTGAAATGCGTAGATATTAGGAAGAACACCAG 645
Query 181 TGGCGAAAGCGGCTTTCTGGACGACAACTGACGCTGAGGCGCGAAAGCGTGGGGAG 236
||||||| |||||||||||||||||||||||||||||||||||||||| ||||||
Sbjct 646 TGGCGAAGGCGGCTTTCTGGACGACAACTGACGCTGAGGCGCGAAAGCCAGGGGAG 701
>NR_113377.1 Veillonella ratti strain JCM 6512 16S ribosomal RNA, partial
sequence
Length=1524
Score = 359 bits (194), Expect = 4e-99
Identities = 222/236 (94%), Gaps = 0/236 (0%)
Strand=Plus/Plus
Query 1 TGGCAAGCGTTGTCCGGAATTATTGGGCGTAAAGGGCGCGCAGGCGGTTCGGTAAGTCTG 60
|||||||||||||||||||||||||||||||||| |||||||||||||| ||||||||
Sbjct 555 TGGCAAGCGTTGTCCGGAATTATTGGGCGTAAAGCGCGCGCAGGCGGTTTCATAAGTCTG 614
Query 61 TCTTAAAAGTGCGGGGCTTAACCCCGTGAGGGGACGGAAACTGTCGAACTTGAGTGTCGG 120
|||||||||||||||||||||||||||||||||| ||||||| | ||||| |||| ||||
Sbjct 615 TCTTAAAAGTGCGGGGCTTAACCCCGTGAGGGGATGGAAACTATGGAACTGGAGTATCGG 674
Query 121 AGAGGAAAGCGGAATTCCTAGTGTAGCGGTGAAATGCGTAGATATTAGGAGGAACACCGG 180
|||||||||||||||||||||||||||||||||||||||||||||||||| ||||||| |
Sbjct 675 AGAGGAAAGCGGAATTCCTAGTGTAGCGGTGAAATGCGTAGATATTAGGAAGAACACCAG 734
Query 181 TGGCGAAAGCGGCTTTCTGGACGACAACTGACGCTGAGGCGCGAAAGCGTGGGGAG 236
||||||| |||||||||||||||||||||||||||||||||||||||| ||||||
Sbjct 735 TGGCGAAGGCGGCTTTCTGGACGACAACTGACGCTGAGGCGCGAAAGCCAGGGGAG 790
>NR_029101.1 Veillonella ratti strain RV-12x 16S ribosomal RNA, partial sequence
Length=1396
Score = 359 bits (194), Expect = 4e-99
Identities = 222/236 (94%), Gaps = 0/236 (0%)
Strand=Plus/Plus
Query 1 TGGCAAGCGTTGTCCGGAATTATTGGGCGTAAAGGGCGCGCAGGCGGTTCGGTAAGTCTG 60
|||||||||||||||||||||||||||||||||| |||||||||||||| ||||||||
Sbjct 490 TGGCAAGCGTTGTCCGGAATTATTGGGCGTAAAGCGCGCGCAGGCGGTTTCATAAGTCTG 549
Query 61 TCTTAAAAGTGCGGGGCTTAACCCCGTGAGGGGACGGAAACTGTCGAACTTGAGTGTCGG 120
|||||||||||||||||||||||||||||||||| ||||||| | ||||| |||| ||||
Sbjct 550 TCTTAAAAGTGCGGGGCTTAACCCCGTGAGGGGATGGAAACTATGGAACTGGAGTATCGG 609
Query 121 AGAGGAAAGCGGAATTCCTAGTGTAGCGGTGAAATGCGTAGATATTAGGAGGAACACCGG 180
|||||||||||||||||||||||||||||||||||||||||||||||||| ||||||| |
Sbjct 610 AGAGGAAAGCGGAATTCCTAGTGTAGCGGTGAAATGCGTAGATATTAGGAAGAACACCAG 669
Query 181 TGGCGAAAGCGGCTTTCTGGACGACAACTGACGCTGAGGCGCGAAAGCGTGGGGAG 236
||||||| |||||||||||||||||||||||||||||||||||||||| ||||||
Sbjct 670 TGGCGAAGGCGGCTTTCTGGACGACAACTGACGCTGAGGCGCGAAAGCCAGGGGAG 725
>NR_029207.1 Megasphaera elsdenii strain LC 1 16S ribosomal RNA, partial sequence
Length=1426
Score = 357 bits (193), Expect = 2e-98
Identities = 224/238 (94%), Gaps = 5/238 (2%)
Strand=Plus/Plus
Query 1 TGGCAAGCGTTGTCCGGAATTATTGGGCGTAAAGGGCGCGCAGGCGG-TTCGGTAAGTCT 59
||||||||||||||||||||||||||||||||||||||||||||||| || |||||||
Sbjct 559 TGGCAAGCGTTGTCCGGAATTATTGGGCGTAAAGGGCGCGCAGGCGGCGTC-GTAAGTCG 617
Query 60 GTCTTAAAAGTGCGGGGCTTAACCCCGTGAGGGGACGGAAACTGTCGA-ACTTGAGTGTC 118
||||||||||||||||||||||||||||||||| || ||||||| ||| || |||| ||
Sbjct 618 GTCTTAAAAGTGCGGGGCTTAACCCCGTGAGGG-ACCGAAACTG-CGATGCTAGAGTATC 675
Query 119 GGAGAGGAAAGCGGAATTCCTAGTGTAGCGGTGAAATGCGTAGATATTAGGAGGAACACC 178
||||||||||||||||||||||||||||||||||||||||||||||||||||||||||||
Sbjct 676 GGAGAGGAAAGCGGAATTCCTAGTGTAGCGGTGAAATGCGTAGATATTAGGAGGAACACC 735
Query 179 GGTGGCGAAAGCGGCTTTCTGGACGACAACTGACGCTGAGGCGCGAAAGCGTGGGGAG 236
||||||||||||||||||||||||||||||||||||||||||||||||| ||||||
Sbjct 736 AGTGGCGAAAGCGGCTTTCTGGACGACAACTGACGCTGAGGCGCGAAAGCCAGGGGAG 793
>NR_043656.1 Megasphaera sueciensis strain VTT E-97791 16S ribosomal RNA,
partial sequence
Length=1540
Score = 350 bits (189), Expect = 3e-96
Identities = 216/229 (94%), Gaps = 2/229 (1%)
Strand=Plus/Plus
Query 1 TGGCAAGCGTTGTCCGGAATTATTGGGCGTAAAGGGCGCGCAGGCGGTTCGGT-AAGTCT 59
||||||||||||||||||||||||||||||||||||||||||||||| |||| ||||||
Sbjct 568 TGGCAAGCGTTGTCCGGAATTATTGGGCGTAAAGGGCGCGCAGGCGG-CCGGTCAAGTCT 626
Query 60 GTCTTAAAAGTGCGGGGCTTAACCCCGTGAGGGGACGGAAACTGTCGAACTTGAGTGTCG 119
||||||||||||||||||| |||||||||| ||||||||||||| | || ||||||||
Sbjct 627 GTCTTAAAAGTGCGGGGCTCAACCCCGTGATGGGACGGAAACTGGCAGGCTGGAGTGTCG 686
Query 120 GAGAGGAAAGCGGAATTCCTAGTGTAGCGGTGAAATGCGTAGATATTAGGAGGAACACCG 179
||||||||||| ||||||||||||||||||||||||||||||||||||||||||| |||
Sbjct 687 GAGAGGAAAGCAGAATTCCTAGTGTAGCGGTGAAATGCGTAGATATTAGGAGGAATACCA 746
Query 180 GTGGCGAAAGCGGCTTTCTGGACGACAACTGACGCTGAGGCGCGAAAGC 228
|||||||||||||||||||||||||||||||||||||||||||||||||
Sbjct 747 GTGGCGAAAGCGGCTTTCTGGACGACAACTGACGCTGAGGCGCGAAAGC 795
